# Supplementary material for: Utilizing Skyline to analyze lipidomics data containing liquid chromatography, ion mobility spectrometry and mass spectrometry dimensions
Source: Springer Nature journal article supplement (doi:10.1038/s41596-022-00714-6), 2022-07-13
Supplement: MOESM3 [file 41596_2022_714_MOESM3_ESM24.xlsx]

## Sheet: Neg
Molecule	Replicate	Predicted Result Retention Time	Retention Time	|Predicted RT - Observed RT|	% Difference
Cer(d18:1/18:0)	Plasma_A	21.14	21.53	0.39	1.82798
Cer(d18:1/18:0)	Plasma_B	21.15	21.54	0.39	1.82713
Cer(d18:1/18:0)	Plasma_C	22.13	22.29	0.16	0.720396
Cer(d18:2/20:0)	Plasma_A	21.3	21.71	0.41	1.90653
Cer(d18:2/20:0)	Plasma_B	21.31	21.73	0.42	1.95167
Cer(d18:2/20:0)	Plasma_C	22.29	22.46	0.17	0.759777
Cer(d18:1/20:0)	Plasma_A	22.2	22.87	0.67	2.97315
Cer(d18:1/20:0)	Plasma_B	22.21	22.87	0.66	2.92813
Cer(d18:1/20:0)	Plasma_C	23.22	23.45	0.23	0.985644
Cer(d16:1/23:0)	Plasma_A	22.69	23.4	0.71	3.08093
Cer(d16:1/23:0)	Plasma_B	22.69	23.4	0.71	3.08093
Cer(d16:1/23:0)	Plasma_C	23.72	23.96	0.24	1.00671
Cer(d16:1/24:1)	Plasma_A	22.14	22.85	0.71	3.15626
Cer(d16:1/24:1)	Plasma_B	22.15	22.79	0.64	2.84824
Cer(d16:1/24:1)	Plasma_C	23.15	23.43	0.28	1.20223
Cer(d18:2/22:0)	Plasma_A	22.3	22.96	0.66	2.91648
Cer(d18:2/22:0)	Plasma_B	22.31	22.98	0.67	2.95871
Cer(d18:2/22:0)	Plasma_C	23.32	23.58	0.26	1.10874
Cer(d16:1/24:0);Cer(d18:1/22:0)	Plasma_A	23.09	23.86	0.77	3.28009
Cer(d16:1/24:0);Cer(d18:1/22:0)	Plasma_B	23.1	23.88	0.78	3.32056
Cer(d16:1/24:0);Cer(d18:1/22:0)	Plasma_C	24.14	24.41	0.27	1.11226
Cer(d18:0/22:0)	Plasma_A	23.43	24.16	0.73	3.06787
Cer(d18:0/22:0)	Plasma_B	23.44	24.18	0.74	3.10794
Cer(d18:0/22:0)	Plasma_C	24.49	24.74	0.25	1.01564
Cer(d18:2/23:0)	Plasma_A	22.66	23.48	0.82	3.5544
Cer(d18:2/23:0)	Plasma_B	22.67	23.47	0.8	3.46771
Cer(d18:2/23:0)	Plasma_C	23.69	24.06	0.37	1.54974
Cer(d18:1/23:0)	Plasma_A	23.46	24.31	0.85	3.55872
Cer(d18:1/23:0)	Plasma_B	23.46	24.31	0.85	3.55872
Cer(d18:1/23:0)	Plasma_C	24.51	24.83	0.32	1.29712
Cer(d18:2/24:1)	Plasma_A	22.22	22.9	0.68	3.01418
Cer(d18:2/24:1)	Plasma_B	22.22	22.92	0.7	3.10146
Cer(d18:2/24:1)	Plasma_C	23.24	23.55	0.31	1.32507
Cer(d18:1/24:1)	Plasma_A	22.98	23.81	0.83	3.54777
Cer(d18:1/24:1)	Plasma_B	22.99	23.78	0.79	3.37823
Cer(d18:1/24:1)	Plasma_C	24.02	24.35	0.33	1.36448
Cer(d18:2/24:0)	Plasma_A	23.22	24.07	0.85	3.59484
Cer(d18:2/24:0)	Plasma_B	23.23	24.07	0.84	3.5518
Cer(d18:2/24:0)	Plasma_C	24.27	24.6	0.33	1.35052
Cer(d18:1/24:0)	Plasma_A	23.81	24.73	0.92	3.79069
Cer(d18:1/24:0)	Plasma_B	23.82	24.72	0.9	3.70828
Cer(d18:1/24:0)	Plasma_C	24.87	25.21	0.34	1.35783
Cer(d18:1/25:0)	Plasma_A	24.14	25.08	0.94	3.81959
Cer(d18:1/25:0)	Plasma_B	24.15	25.07	0.92	3.73832
Cer(d18:1/25:0)	Plasma_C	25.21	25.54	0.33	1.30049
Cer(d19:1/24:0)	Plasma_A	23.96	24.93	0.97	3.96809
Cer(d19:1/24:0)	Plasma_B	23.97	24.91	0.94	3.84615
Cer(d19:1/24:0)	Plasma_C	25.03	25.35	0.32	1.27035
FA 12:0	Plasma_A	4.66	5.07	0.41	8.42754
FA 12:0	Plasma_B	4.66	5.06	0.4	8.23045
FA 12:0	Plasma_C	5.17	5.3	0.13	2.48329
FA 13:0	Plasma_A	5.43	5.91	0.48	8.46561
FA 13:0	Plasma_B	5.43	5.94	0.51	8.97098
FA 13:0	Plasma_C	5.96	6.18	0.22	3.62438
FA 14:2	Plasma_A	4.33	4.65	0.32	7.12695
FA 14:2	Plasma_C	4.83	4.85	0.02	0.413223
FA 14:1	Plasma_A	5.02	5.45	0.43	8.21394
FA 14:1	Plasma_B	5.02	5.48	0.46	8.7619
FA 14:1	Plasma_C	5.54	5.72	0.18	3.19716
FA 14:0	Plasma_A	6.18	6.74	0.56	8.66873
FA 14:0	Plasma_B	6.18	6.74	0.56	8.66873
FA 14:0	Plasma_C	6.73	6.98	0.25	3.64697
FA 15:1	Plasma_C	6.38	6.48	0.1	1.55521
FA 15:0a	Plasma_A	6.67	7.24	0.57	8.19554
FA 15:0a	Plasma_B	6.66	7.27	0.61	8.75808
FA 15:0a	Plasma_C	7.23	7.58	0.35	4.72654
FA 15:0b	Plasma_A	6.97	7.54	0.57	7.85665
FA 15:0b	Plasma_B	6.96	7.53	0.57	7.86749
FA 15:0b	Plasma_C	7.54	7.81	0.27	3.51792
FA 16:2	Plasma_A	5.53	6.02	0.49	8.48485
FA 16:2	Plasma_B	5.52	6.05	0.53	9.16162
FA 16:2	Plasma_C	6.06	6.33	0.27	4.35835
FA 16:1	Plasma_A	6.42	7.01	0.59	8.7863
FA 16:1	Plasma_B	6.42	7.04	0.62	9.21248
FA 16:1	Plasma_C	6.98	7.28	0.3	4.20757
FA 16:0	Plasma_A	7.8	8.34	0.54	6.69145
FA 16:0	Plasma_B	7.8	8.33	0.53	6.57161
FA 16:0	Plasma_C	8.4	8.57	0.17	2.00354
FA 17:2	Plasma_A	6.16	6.74	0.58	8.99225
FA 17:2	Plasma_C	6.71	7.09	0.38	5.50725
FA 17:1a	Plasma_A	7.23	7.77	0.54	7.2
FA 17:1a	Plasma_B	7.22	7.8	0.58	7.72304
FA 17:1a	Plasma_C	7.81	8.08	0.27	3.39836
FA 17:1b	Plasma_C	8.56	8.8	0.24	2.76498
FA 17:0a	Plasma_A	8.4	8.95	0.55	6.34006
FA 17:0a	Plasma_B	8.4	8.94	0.54	6.22837
FA 17:0a	Plasma_C	9.02	9.25	0.23	2.51779
FA 17:0b	Plasma_A	8.79	9.25	0.46	5.09978
FA 17:0b	Plasma_B	8.79	9.24	0.45	4.99168
FA 17:0b	Plasma_C	9.42	9.6	0.18	1.89274
FA 18:3	Plasma_A	5.94	6.51	0.57	9.15663
FA 18:3	Plasma_B	5.94	6.51	0.57	9.15663
FA 18:3	Plasma_C	6.48	6.75	0.27	4.08163
FA 18:2	Plasma_A	6.85	7.43	0.58	8.12325
FA 18:2	Plasma_B	6.85	7.42	0.57	7.98879
FA 18:2	Plasma_C	7.43	7.74	0.31	4.08701
FA 18:1	Plasma_A	8.08	8.6	0.52	6.23501
FA 18:1	Plasma_B	8.08	8.6	0.52	6.23501
FA 18:1	Plasma_C	8.69	8.95	0.26	2.94785
FA 18:0	Plasma_A	9.91	10.24	0.33	3.27543
FA 18:0	Plasma_B	9.91	10.27	0.36	3.56789
FA 18:0	Plasma_C	10.57	10.7	0.13	1.22238
FA 19:3	Plasma_C	7.44	7.62	0.18	2.39044
FA 19:1a	Plasma_A	9.05	9.51	0.46	4.9569
FA 19:1a	Plasma_B	9.05	9.51	0.46	4.9569
FA 19:1a	Plasma_C	9.69	9.94	0.25	2.54712
FA 19:1b	Plasma_B	9.35	9.77	0.42	4.39331
FA 19:1b	Plasma_C	10	10.24	0.24	2.37154
FA 19:0a	Plasma_A	10.93	10.92	0.01	0.0915332
FA 19:0a	Plasma_C	11.62	11.46	0.16	1.38648
FA 19:0b	Plasma_A	11.12	11.38	0.26	2.31111
FA 19:0b	Plasma_B	11.12	11.37	0.25	2.22321
FA 19:0b	Plasma_C	11.81	11.91	0.1	0.84317
FA 20:5	Plasma_A	5.71	6.25	0.54	9.0301
FA 20:5	Plasma_B	5.71	6.2	0.49	8.22838
FA 20:5	Plasma_C	6.25	6.56	0.31	4.83997
FA 20:4	Plasma_A	6.6	7.16	0.56	8.13953
FA 20:4	Plasma_B	6.59	7.15	0.56	8.15138
FA 20:4	Plasma_C	7.16	7.43	0.27	3.70117
FA 20:3a	Plasma_A	7.34	7.88	0.54	7.09593
FA 20:3a	Plasma_B	7.34	7.88	0.54	7.09593
FA 20:3a	Plasma_C	7.93	8.27	0.34	4.19753
FA 20:3b	Plasma_A	7.66	8.15	0.49	6.19861
FA 20:3b	Plasma_B	7.65	8.14	0.49	6.20646
FA 20:3b	Plasma_C	8.25	8.53	0.28	3.33731
FA 20:2	Plasma_A	8.46	8.95	0.49	5.62895
FA 20:2	Plasma_B	8.46	8.94	0.48	5.51724
FA 20:2	Plasma_C	9.08	9.52	0.44	4.73118
FA 20:1	Plasma_A	10.05	10.43	0.38	3.71094
FA 20:1	Plasma_B	10.05	10.42	0.37	3.61505
FA 20:1	Plasma_C	10.71	10.93	0.22	2.03327
FA 20:0a	Plasma_A	10.63	11	0.37	3.42117
FA 20:0a	Plasma_B	10.62	11.03	0.41	3.78753
FA 20:0a	Plasma_C	11.31	11.57	0.26	2.27273
FA 20:0b	Plasma_A	12.43	12.55	0.12	0.960769
FA 20:0b	Plasma_B	12.43	12.58	0.15	1.19952
FA 20:0b	Plasma_C	13.16	13.2	0.04	0.30349
FA 21:0a	Plasma_C	14.07	14.57	0.5	3.49162
FA 21:0b	Plasma_C	14.95	15.48	0.53	3.4834
FA 22:6	Plasma_A	6.14	6.67	0.53	8.27479
FA 22:6	Plasma_B	6.14	6.66	0.52	8.125
FA 22:6	Plasma_C	6.69	7.01	0.32	4.67153
FA 22:5	Plasma_A	6.86	7.43	0.57	7.97761
FA 22:5	Plasma_B	6.85	7.42	0.57	7.98879
FA 22:5	Plasma_C	7.43	7.77	0.34	4.47368
FA 22:4	Plasma_A	7.88	8.38	0.5	6.15006
FA 22:4	Plasma_B	7.88	8.41	0.53	6.50706
FA 22:4	Plasma_C	8.48	8.8	0.32	3.7037
FA 22:3a	Plasma_A	8.96	9.4	0.44	4.79303
FA 22:3a	Plasma_B	8.96	9.39	0.43	4.68665
FA 22:3a	Plasma_C	9.6	9.86	0.26	2.67215
FA 22:3b	Plasma_B	9.26	9.66	0.4	4.22833
FA 22:3b	Plasma_C	9.9	10.17	0.27	2.69058
FA 22:2	Plasma_A	10.51	10.81	0.3	2.81426
FA 22:2	Plasma_B	10.51	10.84	0.33	3.09133
FA 22:2	Plasma_C	11.19	11.42	0.23	2.0345
FA 22:1	Plasma_A	12.47	12.63	0.16	1.2749
FA 22:1	Plasma_B	12.47	12.66	0.19	1.51214
FA 22:1	Plasma_C	13.2	13.32	0.12	0.904977
FA 22:0	Plasma_A	15.17	15.25	0.08	0.52597
FA 22:0	Plasma_B	15.17	15.2	0.03	0.197563
FA 22:0	Plasma_C	15.98	15.98	0	0
FA 23:0	Plasma_A	15.79	15.06	0.73	4.73258
FA 23:0	Plasma_B	15.79	15.05	0.74	4.79896
FA 23:0	Plasma_C	16.62	15.79	0.83	5.12188
FA 24:1	Plasma_A	15.07	15.17	0.1	0.661376
FA 24:1	Plasma_B	15.08	15.17	0.09	0.595041
FA 24:1	Plasma_C	15.88	15.98	0.1	0.627746
FA 24:0a	Plasma_A	16.72	16.39	0.33	1.99336
FA 24:0a	Plasma_B	16.72	16.34	0.38	2.29885
FA 24:0b	Plasma_A	17.84	17.95	0.11	0.614697
FA 24:0b	Plasma_B	17.85	17.98	0.13	0.725649
FA 24:0b	Plasma_C	18.73	18.71	0.02	0.106838
FA 25:0	Plasma_A	18.38	17.68	0.7	3.88242
FA 25:0	Plasma_B	18.38	17.71	0.67	3.71294
FA 25:0	Plasma_C	19.28	18.48	0.8	4.23729
FA 26:0a	Plasma_A	19.51	19.01	0.5	2.59605
FA 26:0a	Plasma_B	19.52	18.96	0.56	2.9106
FA 26:0a	Plasma_C	20.45	19.78	0.67	3.33085
FA 26:0b	Plasma_A	20.21	20.38	0.17	0.837645
FA 26:0b	Plasma_B	20.22	20.45	0.23	1.13105
FA 26:0b	Plasma_C	21.17	21.14	0.03	0.14181
GM3(d18:1/16:0)	Plasma_A	13.67	12.98	0.69	5.17824
GM3(d18:1/16:0)	Plasma_B	13.67	12.94	0.73	5.48666
GM3(d18:1/16:0)	Plasma_C	14.44	13.99	0.45	3.16567
GM3(d18:1/18:0)	Plasma_A	15.74	14.95	0.79	5.14826
GM3(d18:1/18:0)	Plasma_B	15.75	14.95	0.8	5.21173
GM3(d18:1/18:0)	Plasma_C	16.57	16.11	0.46	2.81518
GM3(d18:1/22:0)	Plasma_A	19.08	18.71	0.37	1.95819
GM3(d18:1/22:0)	Plasma_B	19.08	18.7	0.38	2.01165
GM3(d18:1/22:0)	Plasma_C	20	19.75	0.25	1.25786
GM3(d18:1/24:0)	Plasma_A	20.28	20.22	0.06	0.296296
GM3(d18:1/24:0)	Plasma_B	20.28	20.21	0.07	0.345764
GM3(d18:1/24:0)	Plasma_C	21.24	21.19	0.05	0.235682
HexCer(d18:1/20:0)	Plasma_A	21.26	21.65	0.39	1.81776
HexCer(d18:1/20:0)	Plasma_B	21.27	21.67	0.4	1.86306
HexCer(d18:1/20:0)	Plasma_C	22.25	22.39	0.14	0.62724
HexCer(d18:2/22:0)	Plasma_A	21.34	21.77	0.43	1.9949
HexCer(d18:2/22:0)	Plasma_B	21.34	21.81	0.47	2.17845
HexCer(d18:2/22:0)	Plasma_C	22.33	22.66	0.33	1.46699
HexCer(d18:1/22:0)	Plasma_A	22.22	22.84	0.62	2.75189
HexCer(d18:1/22:0)	Plasma_B	22.22	22.86	0.64	2.8394
HexCer(d18:1/22:0)	Plasma_C	23.23	23.44	0.21	0.899936
HexCer(d18:1/23:0)	Plasma_A	22.6	23.33	0.73	3.17875
HexCer(d18:1/23:0)	Plasma_B	22.6	23.36	0.76	3.30722
HexCer(d18:1/23:0)	Plasma_C	23.62	23.91	0.29	1.22028
HexCer(d18:2/24:1)	Plasma_A	21.28	21.74	0.46	2.13854
HexCer(d18:2/24:1)	Plasma_B	21.28	21.77	0.49	2.27642
HexCer(d18:2/24:1)	Plasma_C	22.27	22.67	0.4	1.78015
HexCer(d18:1/24:1)	Plasma_A	22.12	22.76	0.64	2.85205
HexCer(d18:1/24:1)	Plasma_B	22.13	22.75	0.62	2.76292
HexCer(d18:1/24:1)	Plasma_C	23.14	23.39	0.25	1.07458
HexCer(d18:2/24:0)	Plasma_A	22.28	22.98	0.7	3.09324
HexCer(d18:2/24:0)	Plasma_B	22.28	22.96	0.68	3.00619
HexCer(d18:2/24:0)	Plasma_C	23.3	23.52	0.22	0.939769
HexCer(d18:1/24:0)	Plasma_A	23.01	23.8	0.79	3.37535
HexCer(d18:1/24:0)	Plasma_B	23.02	23.82	0.8	3.41588
HexCer(d18:1/24:0)	Plasma_C	24.05	24.35	0.3	1.23967
LPC(0:0/14:0)	Plasma_A	5.23	5.52	0.29	5.39535
LPC(0:0/14:0)	Plasma_B	5.23	5.51	0.28	5.21415
LPC(0:0/14:0)	Plasma_C	5.76	5.92	0.16	2.73973
LPC(14:0/0:0)	Plasma_A	5.5	5.82	0.32	5.65371
LPC(14:0/0:0)	Plasma_B	5.49	5.81	0.32	5.66372
LPC(14:0/0:0)	Plasma_C	6.03	6.22	0.19	3.10204
LPC(0:0/15:0)	Plasma_A	5.85	6.27	0.42	6.93069
LPC(0:0/15:0)	Plasma_B	5.85	6.23	0.38	6.29139
LPC(0:0/15:0)	Plasma_C	6.4	6.52	0.12	1.85759
LPC(15:0/0:0)	Plasma_A	6.11	6.43	0.32	5.10367
LPC(15:0/0:0)	Plasma_B	6.11	6.46	0.35	5.56881
LPC(15:0/0:0)	Plasma_C	6.66	6.87	0.21	3.10421
LPC(0:0/16:1)	Plasma_A	5.52	5.82	0.3	5.29101
LPC(0:0/16:1)	Plasma_B	5.52	5.85	0.33	5.80475
LPC(0:0/16:1)	Plasma_C	6.05	6.22	0.17	2.77099
LPC(16:1/0:0)	Plasma_A	5.72	6.08	0.36	6.10169
LPC(16:1/0:0)	Plasma_B	5.72	6.08	0.36	6.10169
LPC(16:1/0:0)	Plasma_C	6.26	6.45	0.19	2.98977
LPC(0:0/16:0)	Plasma_A	6.52	6.84	0.32	4.79042
LPC(0:0/16:0)	Plasma_B	6.52	6.87	0.35	5.22778
LPC(0:0/16:0)	Plasma_C	7.08	7.21	0.13	1.81945
LPC(16:0/0:0)	Plasma_A	6.82	7.15	0.33	4.72441
LPC(16:0/0:0)	Plasma_B	6.81	7.14	0.33	4.73118
LPC(16:0/0:0)	Plasma_C	7.39	7.51	0.12	1.61074
LPC(0:0/17:0)	Plasma_A	7.34	7.6	0.26	3.48059
LPC(0:0/17:0)	Plasma_B	7.33	7.59	0.26	3.48525
LPC(0:0/17:0)	Plasma_C	7.92	8	0.08	1.00503
LPC(17:0/0:0)	Plasma_A	7.58	7.79	0.21	2.7326
LPC(17:0/0:0)	Plasma_B	7.57	7.78	0.21	2.73616
LPC(17:0/0:0)	Plasma_C	8.17	8.23	0.06	0.731707
LPC(0:0/18:3)	Plasma_C	5.84	5.77	0.07	1.20586
LPC(18:3/0:0)	Plasma_A	5.45	5.63	0.18	3.2491
LPC(18:3/0:0)	Plasma_B	5.44	5.62	0.18	3.25497
LPC(18:3/0:0)	Plasma_C	5.98	6.18	0.2	3.28947
LPC(0:0/18:2)	Plasma_A	5.84	6.2	0.36	5.98007
LPC(0:0/18:2)	Plasma_B	5.83	6.19	0.36	5.99002
LPC(0:0/18:2)	Plasma_C	6.38	6.6	0.22	3.38983
LPC(18:2/0:0)	Plasma_A	6.06	6.46	0.4	6.38978
LPC(18:2/0:0)	Plasma_B	6.06	6.46	0.4	6.38978
LPC(18:2/0:0)	Plasma_C	6.61	6.83	0.22	3.27381
LPC(0:0/18:1)	Plasma_A	6.72	7.11	0.39	5.63991
LPC(0:0/18:1)	Plasma_B	6.72	7.14	0.42	6.06061
LPC(0:0/18:1)	Plasma_C	7.29	7.43	0.14	1.90217
LPC(18:1/0:0)	Plasma_A	7.02	7.34	0.32	4.45682
LPC(18:1/0:0)	Plasma_B	7.02	7.33	0.31	4.32056
LPC(18:1/0:0)	Plasma_C	7.6	7.74	0.14	1.82529
LPC(0:0/18:0)	Plasma_A	8.06	8.21	0.15	1.84388
LPC(0:0/18:0)	Plasma_B	8.06	8.2	0.14	1.72202
LPC(0:0/18:0)	Plasma_C	8.66	8.69	0.03	0.345821
LPC(18:0/0:0)	Plasma_A	8.45	8.55	0.1	1.17647
LPC(18:0/0:0)	Plasma_B	8.45	8.54	0.09	1.05945
LPC(18:0/0:0)	Plasma_C	9.07	9.06	0.01	0.110314
LPC(0:0/20:4)	Plasma_A	5.73	6.08	0.35	5.92718
LPC(0:0/20:4)	Plasma_B	5.72	6.08	0.36	6.10169
LPC(0:0/20:4)	Plasma_C	6.26	6.49	0.23	3.60784
LPC(20:4/0:0)	Plasma_A	5.91	6.31	0.4	6.54664
LPC(20:4/0:0)	Plasma_B	5.91	6.31	0.4	6.54664
LPC(20:4/0:0)	Plasma_C	6.46	6.68	0.22	3.34855
LPC(0:0/20:3)	Plasma_A	6.17	6.5	0.33	5.20916
LPC(0:0/20:3)	Plasma_B	6.17	6.49	0.32	5.05529
LPC(0:0/20:3)	Plasma_C	6.72	6.98	0.26	3.79562
LPC(20:3/0:0)	Plasma_A	6.43	6.84	0.41	6.17935
LPC(20:3/0:0)	Plasma_B	6.43	6.84	0.41	6.17935
LPC(20:3/0:0)	Plasma_C	6.99	7.21	0.22	3.09859
LPC(0:0/22:6)	Plasma_A	5.54	5.89	0.35	6.12423
LPC(0:0/22:6)	Plasma_B	5.54	5.93	0.39	6.80035
LPC(0:0/22:6)	Plasma_C	6.08	6.34	0.26	4.1868
LPC(22:6/0:0)	Plasma_A	5.73	6.08	0.35	5.92718
LPC(22:6/0:0)	Plasma_B	5.72	6.08	0.36	6.10169
LPC(22:6/0:0)	Plasma_C	6.27	6.52	0.25	3.9093
LPC(0:0/22:5)	Plasma_C	6.46	6.68	0.22	3.34855
LPC(22:5/0:0)	Plasma_A	6.08	6.5	0.42	6.67727
LPC(22:5/0:0)	Plasma_B	6.08	6.46	0.38	6.06061
LPC(22:5/0:0)	Plasma_C	6.63	6.87	0.24	3.55556
LPE(0:0/16:0)	Plasma_A	6.74	7.07	0.33	4.77915
LPE(0:0/16:0)	Plasma_B	6.74	7.06	0.32	4.63768
LPE(0:0/16:0)	Plasma_C	7.31	7.43	0.12	1.62822
LPE(16:0/0:0)	Plasma_A	7.02	7.3	0.28	3.91061
LPE(16:0/0:0)	Plasma_B	7.02	7.33	0.31	4.32056
LPE(16:0/0:0)	Plasma_C	7.6	7.7	0.1	1.30719
LPE(0:0/18:2)	Plasma_A	6	6.39	0.39	6.2954
LPE(0:0/18:2)	Plasma_B	6	6.42	0.42	6.76329
LPE(0:0/18:2)	Plasma_C	6.55	6.79	0.24	3.5982
LPE(18:2/0:0)	Plasma_A	6.23	6.61	0.38	5.919
LPE(18:2/0:0)	Plasma_B	6.22	6.61	0.39	6.0795
LPE(18:2/0:0)	Plasma_C	6.78	6.98	0.2	2.90698
LPE(0:0/18:1)	Plasma_A	6.69	7.18	0.49	7.06561
LPE(0:0/18:1)	Plasma_B	6.69	7.18	0.49	7.06561
LPE(0:0/18:1)	Plasma_C	7.26	7.59	0.33	4.44444
LPE(18:1/0:0)	Plasma_A	7.09	7.49	0.4	5.48697
LPE(18:1/0:0)	Plasma_B	7.09	7.52	0.43	5.88638
LPE(18:1/0:0)	Plasma_C	7.67	7.93	0.26	3.33333
LPE(0:0/18:0)	Plasma_A	8.37	8.47	0.1	1.18765
LPE(0:0/18:0)	Plasma_B	8.37	8.47	0.1	1.18765
LPE(0:0/18:0)	Plasma_C	8.99	8.95	0.04	0.445931
LPE(18:0/0:0)	Plasma_A	8.73	8.78	0.05	0.571102
LPE(18:0/0:0)	Plasma_B	8.72	8.77	0.05	0.571755
LPE(18:0/0:0)	Plasma_C	9.35	9.29	0.06	0.643777
LPE(0:0/20:4)	Plasma_A	5.91	6.27	0.36	5.91133
LPE(0:0/20:4)	Plasma_B	5.91	6.27	0.36	5.91133
LPE(0:0/20:4)	Plasma_C	6.46	6.68	0.22	3.34855
LPE(20:4/0:0)	Plasma_A	6.08	6.46	0.38	6.06061
LPE(20:4/0:0)	Plasma_B	6.08	6.46	0.38	6.06061
LPE(20:4/0:0)	Plasma_C	6.63	6.87	0.24	3.55556
LPE(0:0/20:3)	Plasma_A	7.59	6.77	0.82	11.4206
LPE(0:0/20:3)	Plasma_B	7.59	6.8	0.79	10.9798
LPE(0:0/20:3)	Plasma_C	8.19	7.17	1.02	13.2812
LPE(20:3/0:0)	Plasma_A	6.62	6.99	0.37	5.43718
LPE(20:3/0:0)	Plasma_B	6.62	6.99	0.37	5.43718
LPE(20:3/0:0)	Plasma_C	7.18	7.36	0.18	2.47593
PC(14:0_16:0)	Plasma_A	17.43	17.11	0.32	1.85292
PC(14:0_16:0)	Plasma_B	17.43	17.14	0.29	1.67776
PC(14:0_16:0)	Plasma_C	18.31	18.08	0.23	1.26408
PC(13:0_18:1);PC(15:1_16:0)	Plasma_A	17.64	17.34	0.3	1.71527
PC(13:0_18:1);PC(15:1_16:0)	Plasma_B	17.64	17.33	0.31	1.77295
PC(13:0_18:1);PC(15:1_16:0)	Plasma_C	18.52	18.39	0.13	0.704416
PC(15:0_16:0)	Plasma_A	18.82	19.2	0.38	1.99895
PC(15:0_16:0)	Plasma_B	18.82	19.19	0.37	1.94686
PC(14:0_18:2)	Plasma_A	16.09	15.6	0.49	3.09246
PC(14:0_18:2)	Plasma_B	16.09	15.59	0.5	3.15657
PC(14:0_18:2)	Plasma_C	16.93	16.72	0.21	1.24814
PC(32:2)	Plasma_A	17.03	16.73	0.3	1.77725
PC(32:2)	Plasma_B	17.04	16.77	0.27	1.59716
PC(16:0_16:1)	Plasma_A	17.64	17.38	0.26	1.48487
PC(16:0_16:1)	Plasma_B	17.64	17.37	0.27	1.54242
PC(16:0_16:1)	Plasma_C	18.52	18.39	0.13	0.704416
PC(16:0/16:0)	Plasma_A	19.33	19.2	0.13	0.674799
PC(16:0/16:0)	Plasma_B	19.34	19.19	0.15	0.778614
PC(16:0/16:0)	Plasma_C	20.27	20.17	0.1	0.49456
PC(13:0_20:4)	Plasma_A	15.52	15.26	0.26	1.68941
PC(13:0_20:4)	Plasma_B	15.52	15.29	0.23	1.49302
PC(15:0_18:3)a	Plasma_A	16.67	16.39	0.28	1.69389
PC(15:0_18:3)a	Plasma_B	16.67	16.39	0.28	1.69389
PC(15:0_18:3)a	Plasma_C	17.52	17.48	0.04	0.228571
PC(15:0_18:3)b	Plasma_A	16.99	16.7	0.29	1.72158
PC(15:0_18:3)b	Plasma_B	17	16.77	0.23	1.36216
PC(15:0_18:3)b	Plasma_C	17.86	17.82	0.04	0.224215
PC(33:3)	Plasma_A	16.01	15.9	0.11	0.689439
PC(33:3)	Plasma_B	16.01	15.89	0.12	0.752351
PC(15:0_18:1);PC(16:0_17:1)	Plasma_A	19.49	19.35	0.14	0.720906
PC(15:0_18:1);PC(16:0_17:1)	Plasma_B	19.49	19.34	0.15	0.772599
PC(15:0_18:1);PC(16:0_17:1)	Plasma_C	20.43	20.36	0.07	0.343221
PC(14:0_20:4)	Plasma_A	15.72	15.29	0.43	2.7733
PC(14:0_20:4)	Plasma_B	15.72	15.29	0.43	2.7733
PC(14:0_20:4)	Plasma_C	16.55	16.42	0.13	0.788596
PC(16:0_18:3)a	Plasma_A	16.67	16.39	0.28	1.69389
PC(16:0_18:3)a	Plasma_B	16.67	16.39	0.28	1.69389
PC(16:0_18:3)a	Plasma_C	17.52	17.44	0.08	0.457666
PC(16:0_18:3)b	Plasma_A	17.06	16.7	0.36	2.1327
PC(16:0_18:3)b	Plasma_B	17.07	16.69	0.38	2.25118
PC(16:0_18:3)b	Plasma_C	17.93	17.82	0.11	0.615385
PC(16:1_18:2)	Plasma_A	16.01	16.01	0	0
PC(16:1_18:2)	Plasma_B	16.01	15.89	0.12	0.752351
PC(16:1_18:2)	Plasma_C	16.85	17.02	0.17	1.00384
PC(16:0_18:2)	Plasma_A	18.12	17.8	0.32	1.78174
PC(16:0_18:2)	Plasma_B	18.12	17.83	0.29	1.61335
PC(16:0_18:2)	Plasma_C	19.01	18.88	0.13	0.686197
PC(16:0_18:1)	Plasma_A	19.49	19.35	0.14	0.720906
PC(16:0_18:1)	Plasma_B	19.49	19.38	0.11	0.565989
PC(16:0_18:1)	Plasma_C	20.42	20.32	0.1	0.490918
PC(16:0_18:0)	Plasma_A	20.87	21.21	0.34	1.61597
PC(16:0_18:0)	Plasma_B	20.88	21.2	0.32	1.52091
PC(16:0_18:0)	Plasma_C	21.85	22.03	0.18	0.820419
PC(15:0_20:4)	Plasma_A	16.9	17.53	0.63	3.6596
PC(15:0_20:4)	Plasma_B	16.9	17.49	0.59	3.43123
PC(15:0_20:4)	Plasma_C	17.76	17.55	0.21	1.18946
PC(17:1_18:1)	Plasma_A	18.68	18.82	0.14	0.746667
PC(17:1_18:1)	Plasma_B	18.68	18.85	0.17	0.905942
PC(17:1_18:1)	Plasma_C	19.59	19.9	0.31	1.57002
PC(16:0_20:5)	Plasma_A	16.47	16.09	0.38	2.33415
PC(16:0_20:5)	Plasma_B	16.47	16.08	0.39	2.39631
PC(16:0_20:5)	Plasma_C	17.32	17.29	0.03	0.17336
PC(16:1_20:4)	Plasma_A	15.94	15.79	0.15	0.945477
PC(16:1_20:4)	Plasma_B	15.94	15.52	0.42	2.67006
PC(16:1_20:4)	Plasma_C	16.78	16.68	0.1	0.597729
PC(18:2_18:3)	Plasma_A	15.25	14.84	0.41	2.72516
PC(18:2_18:3)	Plasma_B	15.25	14.83	0.42	2.79255
PC(18:2_18:3)	Plasma_C	16.06	16	0.06	0.374298
PC(16:0_20:4)	Plasma_A	17.81	17.49	0.32	1.81303
PC(16:0_20:4)	Plasma_B	17.81	17.52	0.29	1.64166
PC(16:0_20:4)	Plasma_C	18.7	18.62	0.08	0.428725
PC(16:0_20:3)	Plasma_B	18.61	19	0.39	2.07392
PC(16:0_20:3)	Plasma_C	19.51	20.02	0.51	2.58032
PC(18:0_18:3)	Plasma_A	18.51	18.36	0.15	0.81367
PC(18:0_18:3)	Plasma_B	18.52	18.36	0.16	0.867679
PC(18:0_18:3)	Plasma_C	19.42	19.49	0.07	0.359805
PC(18:1_18:2)	Plasma_A	18.28	18.02	0.26	1.43251
PC(18:1_18:2)	Plasma_B	18.28	18.05	0.23	1.26617
PC(18:1_18:2)	Plasma_C	19.18	19.07	0.11	0.575163
PC(18:0_18:2)	Plasma_A	19.84	19.8	0.04	0.201816
PC(18:0_18:2)	Plasma_B	19.84	19.8	0.04	0.201816
PC(18:0_18:2)	Plasma_C	20.79	20.85	0.06	0.288184
PC(18:0_18:1)	Plasma_A	20.87	21.21	0.34	1.61597
PC(18:0_18:1)	Plasma_B	20.88	21.2	0.32	1.52091
PC(18:0_18:1)	Plasma_C	21.85	22.03	0.18	0.820419
PC(15:0_22:6)	Plasma_A	17.2	16.96	0.24	1.40515
PC(15:0_22:6)	Plasma_B	17.2	16.96	0.24	1.40515
PC(15:0_22:6)	Plasma_C	18.07	18.08	0.01	0.055325
PC(37:6)	Plasma_A	16.29	16.01	0.28	1.73375
PC(37:6)	Plasma_B	16.3	16.01	0.29	1.79511
PC(37:6)	Plasma_C	17.14	17.06	0.08	0.467836
PC(15:0_22:5)	Plasma_A	17.95	17.68	0.27	1.51558
PC(15:0_22:5)	Plasma_B	17.95	17.68	0.27	1.51558
PC(17:0_20:5)	Plasma_A	18.51	18.25	0.26	1.41458
PC(17:0_20:5)	Plasma_B	18.52	18.28	0.24	1.30435
PC(17:0_20:3)	Plasma_A	20.22	20.3	0.08	0.394867
PC(17:0_20:3)	Plasma_B	20.23	20.29	0.06	0.29615
PC(18:2_19:0)	Plasma_A	20.54	20.75	0.21	1.0172
PC(18:2_19:0)	Plasma_B	20.54	20.75	0.21	1.0172
PC(17:0_20:2)	Plasma_A	21.03	21.43	0.4	1.88413
PC(17:0_20:2)	Plasma_B	21.03	21.43	0.4	1.88413
PC(17:0_20:2)	Plasma_C	22.01	21.65	0.36	1.64911
PC(18:2_20:4)	Plasma_A	16.36	16.01	0.35	2.1625
PC(18:2_20:4)	Plasma_B	16.36	16.01	0.35	2.1625
PC(18:2_20:4)	Plasma_C	17.21	17.06	0.15	0.875401
PC(16:0_22:6)	Plasma_A	17.3	16.96	0.34	1.98482
PC(16:0_22:6)	Plasma_B	17.3	16.96	0.34	1.98482
PC(16:0_22:6)	Plasma_C	18.18	18.08	0.1	0.551572
PC(16:0_22:5);PC(18:1_20:4)	Plasma_A	17.91	17.68	0.23	1.2925
PC(16:0_22:5);PC(18:1_20:4)	Plasma_B	17.91	17.68	0.23	1.2925
PC(16:0_22:5);PC(18:1_20:4)	Plasma_C	18.8	18.73	0.07	0.373035
PC(18:0_20:5)	Plasma_A	18.49	18.25	0.24	1.30648
PC(18:0_20:5)	Plasma_B	18.5	18.28	0.22	1.1963
PC(18:0_20:5)	Plasma_C	19.4	19.3	0.1	0.516796
PC(16:0_22:4)	Plasma_A	19.11	18.93	0.18	0.946372
PC(16:0_22:4)	Plasma_B	19.12	18.93	0.19	0.998686
PC(16:0_22:4)	Plasma_C	20.04	20.02	0.02	0.0998502
PC(18:0_20:4)	Plasma_A	19.64	19.54	0.1	0.510465
PC(18:0_20:4)	Plasma_B	19.64	19.53	0.11	0.561654
PC(18:0_20:4)	Plasma_C	20.58	20.59	0.01	0.0485791
PC(18:0_20:3)	Plasma_A	20.22	20.3	0.08	0.394867
PC(18:0_20:3)	Plasma_B	20.23	20.33	0.1	0.493097
PC(18:0_20:3)	Plasma_C	21.18	21.31	0.13	0.611909
PC(18:0_20:2)	Plasma_A	21.05	21.43	0.38	1.78908
PC(18:0_20:2)	Plasma_B	21.05	21.24	0.19	0.898558
PC(18:0_20:2)	Plasma_C	22.03	22.1	0.07	0.317245
PC(19:0_20:4)	Plasma_A	20.37	20.83	0.46	2.23301
PC(19:0_20:4)	Plasma_B	20.38	20.75	0.37	1.79917
PC(18:1_22:6)	Plasma_A	17.42	16.96	0.46	2.67597
PC(18:1_22:6)	Plasma_B	17.43	17.03	0.4	2.32153
PC(18:1_22:6)	Plasma_C	18.3	18.31	0.01	0.0546299
PC(18:0_22:6)	Plasma_A	19.21	19.05	0.16	0.836383
PC(18:0_22:6)	Plasma_B	19.21	19.04	0.17	0.888889
PC(18:0_22:6)	Plasma_C	20.14	20.13	0.01	0.0496648
PC(18:0_22:5)a	Plasma_A	19.69	19.58	0.11	0.560224
PC(18:0_22:5)a	Plasma_B	19.69	19.53	0.16	0.81591
PC(18:0_22:5)a	Plasma_C	20.63	20.62	0.01	0.0484848
PC(18:0_22:5)b	Plasma_A	20.22	20.3	0.08	0.394867
PC(18:0_22:5)b	Plasma_B	20.23	20.29	0.06	0.29615
PC(18:0_22:5)b	Plasma_C	21.18	21.31	0.13	0.611909
PC(18:0_22:4)	Plasma_A	20.59	20.83	0.24	1.15886
PC(18:0_22:4)	Plasma_B	20.6	20.82	0.22	1.06229
PC(18:0_22:4)	Plasma_C	21.56	21.72	0.16	0.739372
PC(20:4_22:6)	Plasma_C	16.25	16.27	0.02	0.123001
PC(P-16:0/17:2)	Plasma_A	19.02	18.86	0.16	0.844773
PC(P-16:0/17:2)	Plasma_B	19.03	18.85	0.18	0.95037
PC(O-16:0/18:3);PC(P-16:0/18:2)	Plasma_A	19.04	18.86	0.18	0.949868
PC(O-16:0/18:3);PC(P-16:0/18:2)	Plasma_B	19.05	18.85	0.2	1.05541
PC(O-16:0/18:3);PC(P-16:0/18:2)	Plasma_C	19.97	19.83	0.14	0.703518
PC(O-16:0/18:2)	Plasma_A	19.29	19.24	0.05	0.259538
PC(O-16:0/18:2)	Plasma_B	19.29	19.15	0.14	0.728408
PC(O-16:0/18:2)	Plasma_C	20.22	20.17	0.05	0.247586
PC(P-16:0/18:1)	Plasma_A	19.8	20.37	0.57	2.83794
PC(P-16:0/18:1)	Plasma_B	19.81	20.37	0.56	2.78746
PC(P-16:0/18:1)	Plasma_C	20.75	21.5	0.75	3.5503
PC(P-18:0/16:0)	Plasma_A	20.43	20.56	0.13	0.634301
PC(P-18:0/16:0)	Plasma_B	20.43	20.59	0.16	0.780107
PC(P-18:0/16:0)	Plasma_C	21.39	21.53	0.14	0.652377
PC(P-16:0/20:4)	Plasma_A	18.75	18.52	0.23	1.23424
PC(P-16:0/20:4)	Plasma_B	18.75	18.55	0.2	1.07239
PC(P-16:0/20:4)	Plasma_C	19.66	19.56	0.1	0.509944
PC(O-16:0/20:4);PC(P-18:0/18:3)	Plasma_A	19.02	18.82	0.2	1.05708
PC(O-16:0/20:4);PC(P-18:0/18:3)	Plasma_B	19.03	18.81	0.22	1.16279
PC(O-16:0/20:4);PC(P-18:0/18:3)	Plasma_C	19.95	19.9	0.05	0.250941
PC(O-16:0/20:3)	Plasma_C	20.44	20.36	0.08	0.392157
PC(P-18:0/18:2)	Plasma_A	20.56	20.75	0.19	0.919874
PC(P-18:0/18:2)	Plasma_B	20.56	20.78	0.22	1.06434
PC(P-18:0/18:2)	Plasma_C	21.53	21.65	0.12	0.555813
PC(O-16:0/22:6)	Plasma_A	18.51	18.21	0.3	1.63399
PC(O-16:0/22:6)	Plasma_B	18.51	18.28	0.23	1.25034
PC(O-16:0/22:6)	Plasma_C	19.42	19.34	0.08	0.412797
PC(P-16:0/22:5)	Plasma_A	18.86	18.63	0.23	1.22699
PC(P-16:0/22:5)	Plasma_B	18.86	18.62	0.24	1.28068
PC(P-16:0/22:5)	Plasma_C	19.78	19.71	0.07	0.35452
PC(O-16:0/22:5);PC(P-18:0/20:4)a	Plasma_A	19.07	18.89	0.18	0.948367
PC(O-16:0/22:5);PC(P-18:0/20:4)a	Plasma_B	19.08	18.93	0.15	0.789266
PC(O-16:0/22:5);PC(P-18:0/20:4)a	Plasma_C	20	19.98	0.02	0.10005
PC(P-18:0/20:4)b	Plasma_A	20.36	20.45	0.09	0.441068
PC(P-18:0/20:4)b	Plasma_B	20.36	20.44	0.08	0.392157
PC(P-18:0/20:4)b	Plasma_C	21.32	21.42	0.1	0.467946
PC(O-18:0/20:4)	Plasma_A	20.55	20.75	0.2	0.968523
PC(O-18:0/20:4)	Plasma_B	20.56	20.75	0.19	0.919874
PC(O-18:0/20:4)	Plasma_C	21.52	21.65	0.13	0.60227
PC(P-18:0/22:6)a	Plasma_C	19.56	19.52	0.04	0.204708
PC(P-18:0/22:6)b	Plasma_C	20.91	20.85	0.06	0.287356
PC(O-18:0/22:5)	Plasma_A	20.53	20.83	0.3	1.45068
PC(O-18:0/22:5)	Plasma_B	20.54	20.82	0.28	1.35397
PC(O-18:0/22:5)	Plasma_C	21.5	21.68	0.18	0.833719
PC(O-18:0/22:4)	Plasma_C	22.38	22.59	0.21	0.933956
PC(O-20:0/20:4)	Plasma_C	22.7	22.97	0.27	1.1824
PC(O-20:0/22:6)	Plasma_A	21.46	22	0.54	2.48504
PC(O-20:0/22:6)	Plasma_B	21.46	22	0.54	2.48504
PC(O-20:0/22:6)	Plasma_C	22.45	22.67	0.22	0.975177
PC(O-42:6);PC(P-42:5)	Plasma_A	20.7	20.94	0.24	1.15274
PC(O-42:6);PC(P-42:5)	Plasma_B	20.71	20.97	0.26	1.2476
PC(O-42:6);PC(P-42:5)	Plasma_C	21.67	21.87	0.2	0.918695
PE(32:1)b	Plasma_A	18.15	17.83	0.32	1.77877
PE(32:1)b	Plasma_B	18.15	17.83	0.32	1.77877
PE(32:1)b	Plasma_C	19.05	18.96	0.09	0.47356
PE(14:0_20:4)	Plasma_C	16.69	16.91	0.22	1.30952
PE(16:0_18:3)a	Plasma_C	18.04	17.93	0.11	0.611621
PE(16:0_18:3)b	Plasma_C	18.46	18.24	0.22	1.19891
PE(16:0_18:2)	Plasma_A	18.51	18.25	0.26	1.41458
PE(16:0_18:2)	Plasma_B	18.51	18.24	0.27	1.46939
PE(16:0_18:2)	Plasma_C	19.42	19.3	0.12	0.619835
PE(16:0_18:1)a	Plasma_C	18.54	18.39	0.15	0.812348
PE(16:0_18:1)b	Plasma_A	19.81	19.77	0.04	0.202122
PE(16:0_18:1)b	Plasma_B	19.81	19.72	0.09	0.45535
PE(16:0_18:1)b	Plasma_C	20.75	20.74	0.01	0.0482044
PE(16:0_18:0)	Plasma_C	20.4	20.17	0.23	1.13384
PE(16:0_20:5)	Plasma_B	16.79	16.54	0.25	1.50015
PE(16:0_20:5)	Plasma_C	17.65	17.71	0.06	0.339367
PE(36:5)	Plasma_A	16.12	16.54	0.42	2.57195
PE(36:5)	Plasma_B	16.12	16.54	0.42	2.57195
PE(36:5)	Plasma_C	16.96	17.71	0.75	4.32651
PE(16:0_20:4);PE(18:2/18:2)	Plasma_A	18.16	17.98	0.18	0.996126
PE(16:0_20:4);PE(18:2/18:2)	Plasma_B	18.16	17.98	0.18	0.996126
PE(16:0_20:4);PE(18:2/18:2)	Plasma_C	19.05	19.03	0.02	0.105042
PE(18:1_18:2)	Plasma_A	18.62	18.44	0.18	0.971398
PE(18:1_18:2)	Plasma_B	18.62	18.43	0.19	1.02564
PE(18:1_18:2)	Plasma_C	19.53	19.52	0.01	0.0512164
PE(18:0_18:2)	Plasma_A	20.13	20.18	0.05	0.248077
PE(18:0_18:2)	Plasma_B	20.14	20.18	0.04	0.198413
PE(18:0_18:2)	Plasma_C	21.09	21.15	0.06	0.284091
PE(18:1/18:1)	Plasma_A	19.87	19.92	0.05	0.251319
PE(18:1/18:1)	Plasma_B	19.88	19.91	0.03	0.150792
PE(18:1/18:1)	Plasma_C	20.82	20.74	0.08	0.384986
PE(18:0_18:1)	Plasma_A	21.09	21.47	0.38	1.78571
PE(18:0_18:1)	Plasma_B	21.1	21.5	0.4	1.87793
PE(18:0_18:1)	Plasma_C	22.07	22.25	0.18	0.812274
PE(36:1)	Plasma_A	19.51	20.18	0.67	3.37617
PE(36:1)	Plasma_B	19.51	20.18	0.67	3.37617
PE(36:1)	Plasma_C	20.44	20.36	0.08	0.392157
PE(17:1_20:3)	Plasma_C	17.52	17.55	0.03	0.171086
PE(16:0_22:6)	Plasma_A	17.73	17.42	0.31	1.76387
PE(16:0_22:6)	Plasma_B	17.73	17.41	0.32	1.82129
PE(16:0_22:6)	Plasma_C	18.62	18.58	0.04	0.215054
PE(16:0_22:5);PE(18:1_20:4)a	Plasma_A	18.34	18.1	0.24	1.31723
PE(16:0_22:5);PE(18:1_20:4)a	Plasma_B	18.35	18.09	0.26	1.427
PE(16:0_22:5);PE(18:1_20:4)a	Plasma_C	19.25	19.03	0.22	1.14943
PE(16:0_22:5);PE(18:1_20:4)b	Plasma_A	18.59	18.33	0.26	1.40845
PE(16:0_22:5);PE(18:1_20:4)b	Plasma_B	18.6	18.36	0.24	1.2987
PE(16:0_22:5);PE(18:1_20:4)b	Plasma_C	19.5	19.52	0.02	0.102512
PE(18:0_20:5)	Plasma_A	18.94	18.71	0.23	1.22178
PE(18:0_20:5)	Plasma_B	18.95	18.74	0.21	1.11435
PE(18:0_20:5)	Plasma_C	19.86	19.79	0.07	0.35309
PE(18:0_20:4)	Plasma_A	19.93	19.92	0.01	0.0501882
PE(18:0_20:4)	Plasma_B	19.93	19.91	0.02	0.100402
PE(18:0_20:4)	Plasma_C	20.88	20.96	0.08	0.382409
PE(38:4)	Plasma_A	17.81	17.49	0.32	1.81303
PE(38:4)	Plasma_B	17.81	17.52	0.29	1.64166
PE(18:0_20:3)	Plasma_A	20.48	20.68	0.2	0.971817
PE(18:0_20:3)	Plasma_B	20.49	20.67	0.18	0.874636
PE(18:0_20:3)	Plasma_C	21.45	21.57	0.12	0.55788
PE(38:3)	Plasma_C	19.58	19.45	0.13	0.666154
PE(18:0_20:2)	Plasma_A	19.89	19.92	0.03	0.150716
PE(18:0_20:2)	Plasma_B	19.89	19.91	0.02	0.100503
PE(18:0_20:2)	Plasma_C	20.84	20.96	0.12	0.574163
PE(18:0_20:1)	Plasma_A	20.82	21.13	0.31	1.47795
PE(18:0_20:1)	Plasma_B	20.82	21.2	0.38	1.80866
PE(18:0_20:1)	Plasma_C	21.8	21.99	0.19	0.867778
PE(17:0_22:6)	Plasma_A	18.67	18.1	0.57	3.10035
PE(17:0_22:6)	Plasma_B	18.67	18.05	0.62	3.37691
PE(40:7)a	Plasma_A	17.87	17.57	0.3	1.693
PE(40:7)a	Plasma_B	17.88	17.6	0.28	1.57835
PE(40:7)a	Plasma_C	18.77	18.73	0.04	0.213333
PE(40:7)b	Plasma_A	18.12	18.1	0.02	0.110436
PE(40:7)b	Plasma_B	18.12	17.98	0.14	0.775623
PE(40:7)b	Plasma_C	19.02	18.99	0.03	0.157853
PE(18:0_22:6)	Plasma_A	19.54	19.43	0.11	0.564537
PE(18:0_22:6)	Plasma_B	19.55	19.42	0.13	0.66718
PE(18:0_22:6)	Plasma_C	20.48	20.51	0.03	0.146377
PE(18:0_22:5)a	Plasma_A	19.93	19.92	0.01	0.0501882
PE(18:0_22:5)a	Plasma_B	19.93	19.95	0.02	0.100301
PE(18:0_22:5)a	Plasma_C	20.88	20.96	0.08	0.382409
PE(18:0_22:5)b	Plasma_A	20.48	20.64	0.16	0.77821
PE(18:0_22:5)b	Plasma_B	20.49	20.63	0.14	0.680934
PE(18:0_22:5)b	Plasma_C	21.45	21.57	0.12	0.55788
PE(20:0_20:1)	Plasma_A	21.94	21.62	0.32	1.46924
PE(20:0_20:1)	Plasma_B	21.95	21.69	0.26	1.19157
PE(P-16:0/18:2)	Plasma_A	19.44	19.31	0.13	0.670968
PE(P-16:0/18:2)	Plasma_B	19.44	19.31	0.13	0.670968
PE(P-16:0/18:2)	Plasma_C	20.38	20.36	0.02	0.0981836
PE(P-16:0/18:1)	Plasma_A	20.59	20.79	0.2	0.966651
PE(P-16:0/18:1)	Plasma_B	20.6	20.78	0.18	0.869986
PE(P-16:0/18:1)	Plasma_C	21.56	21.68	0.12	0.555042
PE(P-16:0/20:5)	Plasma_A	17.98	17.64	0.34	1.90904
PE(P-16:0/20:5)	Plasma_B	17.98	17.64	0.34	1.90904
PE(P-16:0/20:5)	Plasma_C	18.87	18.96	0.09	0.475813
PE(P-16:0/20:4)	Plasma_A	19.19	18.97	0.22	1.15304
PE(P-16:0/20:4)	Plasma_B	19.2	18.96	0.24	1.25786
PE(P-16:0/20:4)	Plasma_C	20.12	20.06	0.06	0.298656
PE(O-16:0/20:4)	Plasma_A	19.52	19.27	0.25	1.28899
PE(O-16:0/20:4)	Plasma_B	19.52	19.31	0.21	1.08164
PE(O-16:0/20:4)	Plasma_C	20.46	20.43	0.03	0.146735
PE(P-16:0/20:3)	Plasma_A	19.84	19.77	0.07	0.353446
PE(P-16:0/20:3)	Plasma_B	19.84	19.76	0.08	0.40404
PE(P-16:0/20:3)	Plasma_C	20.79	20.81	0.02	0.0961538
PE(P-16:0/20:2)	Plasma_A	20.65	20.9	0.25	1.20337
PE(P-16:0/20:2)	Plasma_B	20.65	20.93	0.28	1.3468
PE(P-16:0/20:2)	Plasma_C	21.62	21.76	0.14	0.645459
PE(P-18:0/18:2)	Plasma_A	20.87	21.17	0.3	1.42721
PE(P-18:0/18:2)	Plasma_B	20.87	21.16	0.29	1.37997
PE(P-18:0/18:2)	Plasma_C	21.85	22.03	0.18	0.820419
PE(P-18:0/18:1)	Plasma_A	21.7	22.27	0.57	2.59268
PE(P-18:0/18:1)	Plasma_B	21.71	22.26	0.55	2.50171
PE(P-18:0/18:1)	Plasma_C	22.7	22.94	0.24	1.05171
PE(O-18:0/18:1)	Plasma_C	21.48	21.65	0.17	0.788314
PE(P-16:0/22:6)	Plasma_A	18.69	18.44	0.25	1.34662
PE(P-16:0/22:6)	Plasma_B	18.7	18.43	0.27	1.45435
PE(P-16:0/22:6)	Plasma_C	19.61	19.56	0.05	0.255297
PE(O-16:0/22:6)	Plasma_A	19.48	19.31	0.17	0.876515
PE(O-16:0/22:6)	Plasma_B	19.49	19.38	0.11	0.565989
PE(O-16:0/22:6)	Plasma_C	20.42	20.47	0.05	0.244559
PE(P-16:0/22:5)	Plasma_A	19.28	19.12	0.16	0.833333
PE(P-16:0/22:5)	Plasma_B	19.29	19.12	0.17	0.885186
PE(P-16:0/22:5)	Plasma_C	20.21	20.17	0.04	0.198118
PE(P-18:0/20:5)	Plasma_A	19.75	19.69	0.06	0.30426
PE(P-18:0/20:5)	Plasma_B	19.75	19.72	0.03	0.152014
PE(P-18:0/20:5)	Plasma_C	20.69	20.78	0.09	0.434049
PE(P-16:0/22:4)	Plasma_A	20.29	20.33	0.04	0.196947
PE(P-16:0/22:4)	Plasma_B	20.3	20.37	0.07	0.344234
PE(P-16:0/22:4)	Plasma_C	21.26	21.34	0.08	0.375587
PE(P-18:0/20:4)	Plasma_A	20.65	20.87	0.22	1.05973
PE(P-18:0/20:4)	Plasma_B	20.65	20.86	0.21	1.0118
PE(P-18:0/20:4)	Plasma_C	21.62	21.76	0.14	0.645459
PE(P-18:0/20:3)	Plasma_A	21.14	21.13	0.01	0.0473149
PE(P-18:0/20:3)	Plasma_B	21.15	21.16	0.01	0.0472701
PE(P-18:0/20:3)	Plasma_C	22.13	22.03	0.1	0.452899
PE(P-18:0/22:6)	Plasma_A	20.28	20.37	0.09	0.442804
PE(P-18:0/22:6)	Plasma_B	20.28	20.37	0.09	0.442804
PE(P-18:0/22:6)	Plasma_C	21.24	21.38	0.14	0.656969
PE(O-18:0/22:6)	Plasma_A	20.48	20.64	0.16	0.77821
PE(O-18:0/22:6)	Plasma_B	20.48	20.67	0.19	0.923451
PE(O-18:0/22:6)	Plasma_C	21.44	21.61	0.17	0.789779
PE(P-18:0/22:5)a	Plasma_A	20.68	20.9	0.22	1.0582
PE(P-18:0/22:5)a	Plasma_B	20.69	20.93	0.24	1.15329
PE(P-18:0/22:5)a	Plasma_C	21.66	21.84	0.18	0.827586
PE(P-18:0/22:5)b	Plasma_A	21.07	21.43	0.36	1.69412
PE(P-18:0/22:5)b	Plasma_B	21.08	21.47	0.39	1.83314
PE(P-18:0/22:5)b	Plasma_C	22.05	22.29	0.24	1.08254
PE(O-18:0/22:5)	Plasma_A	20.39	21.17	0.78	3.75361
PE(O-18:0/22:5)	Plasma_B	20.39	21.16	0.77	3.70638
PE(O-18:0/22:5)	Plasma_C	21.35	22.06	0.71	3.27114
PE(P-18:0/22:4)	Plasma_A	21.42	21.93	0.51	2.35294
PE(P-18:0/22:4)	Plasma_B	21.43	21.92	0.49	2.26067
PE(P-18:0/22:4)	Plasma_C	22.42	22.67	0.25	1.10889
PE(O-40:5);PE(P-40:4)	Plasma_A	21.74	22.31	0.57	2.58797
PE(O-40:5);PE(P-40:4)	Plasma_B	21.74	22.3	0.56	2.54314
PE(O-40:5);PE(P-40:4)	Plasma_C	22.74	23.01	0.27	1.18033
PE(O-40:4);PE(P-40:3)	Plasma_C	21.56	21.65	0.09	0.41657
PG(18:0_18:2);PG(18:1/18:1)	Plasma_B	16.97	16.42	0.55	3.2944
PI(16:0_16:1)	Plasma_A	14.16	13.51	0.65	4.69823
PI(16:0_16:1)	Plasma_B	14.16	13.51	0.65	4.69823
PI(16:0_16:1)	Plasma_C	14.94	14.56	0.38	2.57627
PI(14:0_18:0);PI(16:0/16:0)	Plasma_A	16.23	15.33	0.9	5.70342
PI(14:0_18:0);PI(16:0/16:0)	Plasma_B	16.24	15.33	0.91	5.76497
PI(16:0_18:2)	Plasma_A	14.69	14.01	0.68	4.73868
PI(16:0_18:2)	Plasma_B	14.69	14	0.69	4.81004
PI(16:0_18:2)	Plasma_C	15.49	15.05	0.44	2.88147
PI(16:0_18:1)	Plasma_A	16.21	15.56	0.65	4.09191
PI(16:0_18:1)	Plasma_B	16.21	15.52	0.69	4.3492
PI(16:0_18:1)	Plasma_C	17.05	16.64	0.41	2.43396
PI(16:0_20:4)	Plasma_A	14.43	13.74	0.69	4.89883
PI(16:0_20:4)	Plasma_B	14.43	13.73	0.7	4.97159
PI(16:0_20:4)	Plasma_C	15.22	14.83	0.39	2.59567
PI(16:0_20:3)	Plasma_A	15.23	14.54	0.69	4.63554
PI(16:0_20:3)	Plasma_B	15.23	14.53	0.7	4.7043
PI(16:0_20:3)	Plasma_C	16.04	15.66	0.38	2.39748
PI(18:1_18:2)	Plasma_A	14.84	14.19	0.65	4.47813
PI(18:1_18:2)	Plasma_B	14.84	14.19	0.65	4.47813
PI(18:1_18:2)	Plasma_C	15.64	15.13	0.51	3.31492
PI(18:0_18:2)	Plasma_A	16.7	16.05	0.65	3.96947
PI(18:0_18:2)	Plasma_B	16.7	16.05	0.65	3.96947
PI(18:0_18:2)	Plasma_C	17.55	17.14	0.41	2.36379
PI(18:1/18:1)	Plasma_A	16.41	15.82	0.59	3.66119
PI(18:1/18:1)	Plasma_B	16.41	15.78	0.63	3.91426
PI(18:1/18:1)	Plasma_C	17.26	16.95	0.31	1.81234
PI(18:0_18:1)	Plasma_A	18.04	17.68	0.36	2.01568
PI(18:0_18:1)	Plasma_B	18.05	17.56	0.49	2.75204
PI(17:0_20:4)	Plasma_A	15.47	14.73	0.74	4.90066
PI(17:0_20:4)	Plasma_B	15.47	14.76	0.71	4.69732
PI(17:0_20:4)	Plasma_C	16.29	15.92	0.37	2.29742
PI(16:0_22:6)	Plasma_A	13.94	13.25	0.69	5.0754
PI(16:0_22:6)	Plasma_B	13.95	13.28	0.67	4.92104
PI(16:0_22:6)	Plasma_C	14.72	14.37	0.35	2.40633
PI(16:0_22:5);PI(18:1_20:4)a	Plasma_A	14.57	13.89	0.68	4.77864
PI(16:0_22:5);PI(18:1_20:4)a	Plasma_B	14.57	13.92	0.65	4.563
PI(16:0_22:5);PI(18:1_20:4)a	Plasma_C	15.37	15.01	0.36	2.36998
PI(18:1_20:4)b	Plasma_A	14.91	14.23	0.68	4.66712
PI(18:1_20:4)b	Plasma_B	14.91	14.19	0.72	4.94845
PI(18:1_20:4)b	Plasma_C	15.71	15.36	0.35	2.25298
PI(18:0_20:4)	Plasma_A	16.46	15.79	0.67	4.15504
PI(18:0_20:4)	Plasma_B	16.46	15.82	0.64	3.9653
PI(18:0_20:4)	Plasma_C	17.31	16.95	0.36	2.10158
PI(18:0_20:3)	Plasma_A	17.21	16.62	0.59	3.48803
PI(18:0_20:3)	Plasma_B	17.22	16.61	0.61	3.60627
PI(18:0_20:3)	Plasma_C	18.09	17.74	0.35	1.95367
PI(19:0_20:4)	Plasma_B	17.29	16.69	0.6	3.53149
PI(18:0_22:6)	Plasma_A	16.02	15.29	0.73	4.66305
PI(18:0_22:6)	Plasma_B	16.02	15.29	0.73	4.66305
PI(18:0_22:6)	Plasma_C	16.85	16.53	0.32	1.91732
SM(d17:1/14:0)	Plasma_A	14.21	14.84	0.63	4.33735
SM(d17:1/14:0)	Plasma_B	14.21	14.87	0.66	4.5392
SM(d16:0/16:1);SM(d18:1/14:0)	Plasma_A	15.39	14.86	0.53	3.50413
SM(d16:0/16:1);SM(d18:1/14:0)	Plasma_B	15.39	14.87	0.52	3.43688
SM(d16:0/16:1);SM(d18:1/14:0)	Plasma_C	16.21	15.85	0.36	2.24579
SM(d18:2/16:0)	Plasma_A	15.7	15.18	0.52	3.36788
SM(d18:2/16:0)	Plasma_B	15.71	15.17	0.54	3.49741
SM(d18:2/16:0)	Plasma_C	16.53	16.23	0.3	1.8315
SM(d18:1/16:0)	Plasma_A	17.65	17.19	0.46	2.64064
SM(d18:1/16:0)	Plasma_B	17.65	17.22	0.43	2.4663
SM(d18:1/16:0)	Plasma_C	18.54	18.2	0.34	1.85084
SM(d18:1/18:1)	Plasma_A	17.82	17.44	0.38	2.15542
SM(d18:1/18:1)	Plasma_B	17.83	17.58	0.25	1.41203
SM(d18:1/18:1)	Plasma_C	18.71	18.37	0.34	1.83387
SM(d18:0/18:1)	Plasma_A	19.55	19.39	0.16	0.821777
SM(d18:0/18:1)	Plasma_B	19.56	19.36	0.2	1.02775
SM(d18:0/18:1)	Plasma_C	20.49	20.36	0.13	0.636475
SM(d19:0/18:1)	Plasma_A	20.35	20.64	0.29	1.41498
SM(d19:0/18:1)	Plasma_B	20.36	20.61	0.25	1.22041
SM(d38:1)	Plasma_A	21.01	21.24	0.23	1.08876
SM(d38:1)	Plasma_B	21.01	21.24	0.23	1.08876
SM(d38:1)	Plasma_C	21.99	22.08	0.09	0.408441
SM(d39:1)	Plasma_A	21.56	22	0.44	2.0202
SM(d39:1)	Plasma_B	21.57	22.01	0.44	2.01927
SM(d39:1)	Plasma_C	22.56	22.63	0.07	0.309803
SM(d18:1/22:0)	Plasma_A	22.07	22.65	0.58	2.59392
SM(d18:1/22:0)	Plasma_B	22.08	22.64	0.56	2.50447
SM(d18:1/22:0)	Plasma_C	23.08	23.2	0.12	0.518583
SM(d18:1/23:0)	Plasma_A	22.54	23.18	0.64	2.79965
SM(d18:1/23:0)	Plasma_B	22.55	23.19	0.64	2.79843
SM(d18:1/23:0)	Plasma_C	23.57	23.73	0.16	0.676533
SM(d42:3)	Plasma_A	21.06	21.34	0.28	1.32075
SM(d42:3)	Plasma_B	21.06	21.35	0.29	1.3676
SM(d42:3)	Plasma_C	22.04	22.16	0.12	0.542986
SM(d18:1/24:1)a	Plasma_A	21.96	22.5	0.54	2.42915
SM(d18:1/24:1)a	Plasma_B	21.97	22.53	0.56	2.51685
SM(d18:1/24:1)a	Plasma_C	22.97	23.16	0.19	0.823759
SM(d18:1/24:1)b	Plasma_A	22.11	22.78	0.67	2.98507
SM(d18:1/24:1)b	Plasma_B	22.12	22.77	0.65	2.89597
SM(d18:1/24:1)b	Plasma_C	23.13	23.28	0.15	0.646412
SM(d18:1/24:0)	Plasma_A	22.96	23.67	0.71	3.04525
SM(d18:1/24:0)	Plasma_B	22.97	23.68	0.71	3.04394
SM(d18:1/24:0)	Plasma_C	24	24.19	0.19	0.788545
SM(d19:1/24:1)	Plasma_A	22.21	22.76	0.55	2.44608
SM(d19:1/24:1)	Plasma_B	22.21	22.83	0.62	2.75311
SM(d19:1/24:1)	Plasma_C	23.22	23.3	0.08	0.343938
Average				0.319369	2.52488

## Sheet: Pos
Peptide	Replicate	Predicted Result Retention Time	Peptide Retention Time	|Predicted RT - Observed RT|	% Difference
AC(10:0)	Plasma_A	2.79	3.27	0.48	15.8416
AC(10:0)	Plasma_B	2.8	3.28	0.48	15.7895
AC(10:0)	Plasma_C	2.75	3.24	0.49	16.3606
AC(12:1)	Plasma_A	3.25	3.54	0.29	8.54197
AC(12:1)	Plasma_B	3.26	3.78	0.52	14.7727
AC(12:1)	Plasma_C	3.21	3.58	0.37	10.8984
AC(12:0)	Plasma_A	3.76	4.14	0.38	9.62025
AC(12:0)	Plasma_B	3.78	4.16	0.38	9.57179
AC(12:0)	Plasma_C	3.72	4.15	0.43	10.9276
AC(14:2)	Plasma_A	3.61	4.14	0.53	13.6774
AC(14:2)	Plasma_B	3.63	3.93	0.3	7.93651
AC(14:2)	Plasma_C	3.57	3.96	0.39	10.3586
AC(14:1)	Plasma_A	4.31	4.68	0.37	8.23137
AC(14:1)	Plasma_B	4.32	4.69	0.37	8.2131
AC(14:1)	Plasma_C	4.27	4.68	0.41	9.16201
AC(14:0)	Plasma_A	5.1	5.47	0.37	7.00095
AC(14:0)	Plasma_B	5.11	5.52	0.41	7.71402
AC(14:0)	Plasma_C	5.05	5.48	0.43	8.16714
AC(16:0)	Plasma_A	6.45	6.84	0.39	5.86907
AC(16:0)	Plasma_B	6.45	6.85	0.4	6.01504
AC(16:0)	Plasma_C	6.4	6.84	0.44	6.64653
AC(18:2)	Plasma_A	5.72	6.19	0.47	7.89253
AC(18:2)	Plasma_B	5.73	6.2	0.47	7.8793
AC(18:2)	Plasma_C	5.68	6.16	0.48	8.10811
AC(18:1)	Plasma_A	6.67	7.02	0.35	5.11322
AC(18:1)	Plasma_B	6.68	7.04	0.36	5.24781
AC(18:1)	Plasma_C	6.63	7.03	0.4	5.85652
AC(18:0)	Plasma_A	8.02	8.2	0.18	2.21948
AC(18:0)	Plasma_B	8.02	8.21	0.19	2.34134
AC(18:0)	Plasma_C	7.97	8.17	0.2	2.47831
AC(24:0)	Plasma_A	14.87	14.3	0.57	3.90812
AC(24:0)	Plasma_B	14.86	14.31	0.55	3.771
AC(24:0)	Plasma_C	14.81	14.23	0.58	3.99449
AC(26:0)	Plasma_A	17.41	16.8	0.61	3.56621
AC(26:0)	Plasma_B	17.4	16.82	0.58	3.38983
AC(26:0)	Plasma_C	17.36	16.73	0.63	3.6961
ANA(16:1)	Plasma_C	6.99	6	0.99	15.2425
ANA(18:3)	Plasma_A	8.27	8.33	0.06	0.722892
ANA(18:3)	Plasma_B	8.27	8.32	0.05	0.602773
CE(18:2)	Plasma_A	27.72	27.98	0.26	0.933573
CE(18:2)	Plasma_B	27.69	27.96	0.27	0.97035
CE(18:2)	Plasma_C	27.66	27.91	0.25	0.899766
CE(20:5)	Plasma_A	26.88	27.11	0.23	0.85201
CE(20:5)	Plasma_B	26.85	27.12	0.27	1.00056
CE(20:5)	Plasma_C	26.82	27.12	0.3	1.11235
CE(20:4)	Plasma_A	27.37	27.6	0.23	0.83682
CE(20:4)	Plasma_B	27.34	27.58	0.24	0.873999
CE(20:4)	Plasma_C	27.3	27.57	0.27	0.984144
CE(20:3)	Plasma_A	27.76	28.02	0.26	0.932234
CE(20:3)	Plasma_B	27.73	28.03	0.3	1.07604
CE(20:3)	Plasma_C	27.69	28.03	0.34	1.22039
CE(22:6)	Plasma_A	27.09	27.38	0.29	1.06481
CE(22:6)	Plasma_B	27.06	27.39	0.33	1.21212
CE(22:6)	Plasma_C	27.02	27.35	0.33	1.2139
Cer(d18:1/23:0)	Plasma_A	24.09	24.31	0.22	0.909091
Cer(d18:1/23:0)	Plasma_B	24.06	24.32	0.26	1.07482
Cer(d18:1/23:0)	Plasma_C	24.02	24.28	0.26	1.0766
Cer(d18:1/24:0)	Plasma_A	24.57	24.72	0.15	0.608643
Cer(d18:1/24:0)	Plasma_B	24.54	24.74	0.2	0.811688
Cer(d18:1/24:0)	Plasma_C	24.51	24.69	0.18	0.731707
DG(16:0_18:1)	Plasma_A	22.41	22.53	0.12	0.534045
DG(16:0_18:1)	Plasma_B	22.39	22.5	0.11	0.490087
DG(16:0_18:1)	Plasma_C	22.35	22.5	0.15	0.668896
DG(18:1_18:2)	Plasma_A	21.52	21.58	0.06	0.278422
DG(18:1_18:2)	Plasma_B	21.5	21.55	0.05	0.232288
DG(18:1_18:2)	Plasma_C	21.45	21.51	0.06	0.27933
DG(18:1/18:1)	Plasma_A	22.48	22.6	0.12	0.532387
DG(18:1/18:1)	Plasma_B	22.46	22.61	0.15	0.665631
DG(18:1/18:1)	Plasma_C	22.42	22.57	0.15	0.666815
DG(18:0_18:1)	Plasma_A	23.39	23.59	0.2	0.851426
DG(18:0_18:1)	Plasma_B	23.36	23.6	0.24	1.02215
DG(18:0_18:1)	Plasma_C	23.32	23.63	0.31	1.32055
LPC(0:0/14:0)	Plasma_A	5.13	5.53	0.4	7.50469
LPC(0:0/14:0)	Plasma_B	5.14	5.54	0.4	7.49064
LPC(0:0/14:0)	Plasma_C	5.09	5.48	0.39	7.37938
LPC(14:0/0:0)	Plasma_A	5.41	5.81	0.4	7.13012
LPC(14:0/0:0)	Plasma_B	5.42	5.82	0.4	7.11744
LPC(14:0/0:0)	Plasma_C	5.37	5.78	0.41	7.35426
LPC(0:0/15:0)	Plasma_A	5.85	6.21	0.36	5.97015
LPC(0:0/15:0)	Plasma_B	5.86	6.24	0.38	6.28099
LPC(0:0/15:0)	Plasma_C	5.81	6.25	0.44	7.29685
LPC(15:0/0:0)	Plasma_A	6.06	6.49	0.43	6.85259
LPC(15:0/0:0)	Plasma_B	6.07	6.51	0.44	6.99523
LPC(15:0/0:0)	Plasma_C	6.01	6.46	0.45	7.21732
LPC(0:0/16:1)	Plasma_A	5.6	5.79	0.19	3.33626
LPC(0:0/16:1)	Plasma_B	5.61	5.71	0.1	1.76678
LPC(0:0/16:1)	Plasma_C	5.55	5.78	0.23	4.06002
LPC(16:1/0:0)	Plasma_A	5.85	6.25	0.4	6.61157
LPC(16:1/0:0)	Plasma_B	5.86	6.3	0.44	7.23684
LPC(16:1/0:0)	Plasma_C	5.81	6.08	0.27	4.54163
LPC(0:0/16:0)	Plasma_A	6.51	6.72	0.21	3.1746
LPC(0:0/16:0)	Plasma_B	6.52	6.73	0.21	3.16981
LPC(0:0/16:0)	Plasma_C	6.47	6.71	0.24	3.64188
LPC(16:0/0:0)	Plasma_A	6.8	6.65	0.15	2.23048
LPC(16:0/0:0)	Plasma_B	6.8	6.64	0.16	2.38095
LPC(16:0/0:0)	Plasma_C	6.75	6.84	0.09	1.3245
LPC(0:0/17:0)	Plasma_A	7.14	7.5	0.36	4.91803
LPC(0:0/17:0)	Plasma_B	7.15	7.59	0.44	5.97015
LPC(0:0/17:0)	Plasma_C	7.1	7.49	0.39	5.34613
LPC(17:0/0:0)	Plasma_A	7.57	7.78	0.21	2.73616
LPC(17:0/0:0)	Plasma_B	7.58	7.79	0.21	2.7326
LPC(17:0/0:0)	Plasma_C	7.52	7.75	0.23	3.01244
LPC(0:0/18:3)	Plasma_A	5.08	5.55	0.47	8.8429
LPC(0:0/18:3)	Plasma_B	5.1	5.54	0.44	8.27068
LPC(0:0/18:3)	Plasma_C	5.04	5.53	0.49	9.27152
LPC(18:3/0:0)	Plasma_A	5.3	5.76	0.46	8.31826
LPC(18:3/0:0)	Plasma_B	5.31	5.79	0.48	8.64865
LPC(18:3/0:0)	Plasma_C	5.26	5.74	0.48	8.72727
LPC(0:0/18:2)	Plasma_A	5.79	6.21	0.42	7
LPC(0:0/18:2)	Plasma_B	5.8	6.24	0.44	7.30897
LPC(0:0/18:2)	Plasma_C	5.75	6.22	0.47	7.85297
LPC(18:2/0:0)	Plasma_A	6.01	6.38	0.37	5.97256
LPC(18:2/0:0)	Plasma_B	6.02	6.37	0.35	5.64972
LPC(18:2/0:0)	Plasma_C	5.97	6.37	0.4	6.48298
LPC(0:0/18:1)	Plasma_A	6.68	7.01	0.33	4.82104
LPC(0:0/18:1)	Plasma_B	6.69	7	0.31	4.52885
LPC(0:0/18:1)	Plasma_C	6.64	6.96	0.32	4.70588
LPC(18:1/0:0)	Plasma_A	6.99	7.33	0.34	4.7486
LPC(18:1/0:0)	Plasma_B	7	7.32	0.32	4.46927
LPC(18:1/0:0)	Plasma_C	6.95	7.28	0.33	4.63809
LPC(0:0/18:0)	Plasma_A	8.05	8.2	0.15	1.84615
LPC(0:0/18:0)	Plasma_B	8.06	8.21	0.15	1.84388
LPC(0:0/18:0)	Plasma_C	8.01	8.17	0.16	1.97775
LPC(18:0/0:0)	Plasma_A	8.43	8.54	0.11	1.29641
LPC(18:0/0:0)	Plasma_B	8.44	8.52	0.08	0.943396
LPC(18:0/0:0)	Plasma_C	8.39	8.49	0.1	1.18483
LPC(0:0/20:5)	Plasma_A	4.87	5.21	0.34	6.74603
LPC(0:0/20:5)	Plasma_B	4.88	5.26	0.38	7.49507
LPC(0:0/20:5)	Plasma_C	4.83	5.25	0.42	8.33333
LPC(20:5/0:0)	Plasma_A	5.07	5.49	0.42	7.95455
LPC(20:5/0:0)	Plasma_B	5.08	5.48	0.4	7.57576
LPC(20:5/0:0)	Plasma_C	5.02	5.48	0.46	8.7619
LPC(0:0/20:4)	Plasma_A	5.64	6.08	0.44	7.50853
LPC(0:0/20:4)	Plasma_B	5.65	6.09	0.44	7.49574
LPC(0:0/20:4)	Plasma_C	5.6	6.08	0.48	8.21918
LPC(20:4/0:0)	Plasma_A	5.85	6.21	0.36	5.97015
LPC(20:4/0:0)	Plasma_B	5.86	6.24	0.38	6.28099
LPC(20:4/0:0)	Plasma_C	5.81	6.22	0.41	6.81629
LPC(0:0/20:3)	Plasma_A	6.06	6.49	0.43	6.85259
LPC(0:0/20:3)	Plasma_B	6.07	6.54	0.47	7.4544
LPC(0:0/20:3)	Plasma_C	6.01	6.46	0.45	7.21732
LPC(20:3/0:0)	Plasma_A	6.41	6.84	0.43	6.49057
LPC(20:3/0:0)	Plasma_B	6.42	6.81	0.39	5.89569
LPC(20:3/0:0)	Plasma_C	6.36	6.8	0.44	6.68693
LPC(20:2_0:0)	Plasma_A	7.21	7.52	0.31	4.2091
LPC(20:2_0:0)	Plasma_B	7.22	7.49	0.27	3.67097
LPC(20:2_0:0)	Plasma_C	7.17	7.51	0.34	4.63215
LPC(20:0_0:0)	Plasma_A	10.37	10.32	0.05	0.483325
LPC(20:0_0:0)	Plasma_B	10.37	10.3	0.07	0.67731
LPC(20:0_0:0)	Plasma_C	10.32	10.27	0.05	0.485673
LPC(0:0/22:6)	Plasma_A	5.4	5.89	0.49	8.68025
LPC(0:0/22:6)	Plasma_B	5.41	5.9	0.49	8.6649
LPC(0:0/22:6)	Plasma_C	5.36	5.86	0.5	8.91266
LPC(22:6/0:0)	Plasma_A	5.64	6.08	0.44	7.50853
LPC(22:6/0:0)	Plasma_B	5.65	6.09	0.44	7.49574
LPC(22:6/0:0)	Plasma_C	5.6	6.08	0.48	8.21918
LPC(22:5_0:0)	Plasma_A	6.01	6.48	0.47	7.52602
LPC(22:5_0:0)	Plasma_B	6.02	6.47	0.45	7.20576
LPC(22:5_0:0)	Plasma_C	5.97	6.48	0.51	8.19277
LPE(0:0/18:2)	Plasma_A	5.98	6.4	0.42	6.78514
LPE(0:0/18:2)	Plasma_B	5.99	6.34	0.35	5.67721
LPE(0:0/18:2)	Plasma_C	5.94	6.39	0.45	7.29927
LPE(18:2/0:0)	Plasma_A	6.12	6.53	0.41	6.48221
LPE(18:2/0:0)	Plasma_B	6.13	6.54	0.41	6.47198
LPE(18:2/0:0)	Plasma_C	6.07	6.52	0.45	7.14853
LPE(0:0/18:1)	Plasma_A	6.86	7.21	0.35	4.97512
LPE(0:0/18:1)	Plasma_B	6.87	7.23	0.36	5.10638
LPE(0:0/18:1)	Plasma_C	6.82	7.18	0.36	5.14286
LPE(18:1/0:0)	Plasma_A	7.22	7.5	0.28	3.80435
LPE(18:1/0:0)	Plasma_B	7.23	7.49	0.26	3.53261
LPE(18:1/0:0)	Plasma_C	7.18	7.51	0.33	4.49285
LPE(0:0/18:0)	Plasma_A	8.33	8.43	0.1	1.19332
LPE(0:0/18:0)	Plasma_B	8.33	8.42	0.09	1.07463
LPE(0:0/18:0)	Plasma_C	8.28	8.42	0.14	1.67665
LPE(18:0/0:0)	Plasma_A	8.71	8.77	0.06	0.686499
LPE(18:0/0:0)	Plasma_B	8.72	8.76	0.04	0.457666
LPE(18:0/0:0)	Plasma_C	8.67	8.74	0.07	0.804136
LPE(0:0/22:6)	Plasma_A	5.63	6.1	0.47	8.01364
LPE(0:0/22:6)	Plasma_B	5.64	6.07	0.43	7.34415
LPE(0:0/22:6)	Plasma_C	5.58	6.05	0.47	8.08255
LPE(22:6/0:0)	Plasma_A	5.8	6.27	0.47	7.7879
LPE(22:6/0:0)	Plasma_B	5.81	6.26	0.45	7.4565
LPE(22:6/0:0)	Plasma_C	5.76	6.24	0.48	8
PC(28:0)	Plasma_A	15.3	14.96	0.34	2.24719
PC(28:0)	Plasma_B	15.29	14.81	0.48	3.18937
PC(28:0)	Plasma_C	15.25	14.73	0.52	3.46898
PC(30:1)	Plasma_A	15.47	15.15	0.32	2.09014
PC(30:1)	Plasma_B	15.46	15.05	0.41	2.68764
PC(30:1)	Plasma_C	15.41	14.99	0.42	2.76316
PC(14:0_16:0)	Plasma_A	17.56	17.07	0.49	2.82992
PC(14:0_16:0)	Plasma_B	17.55	17.06	0.49	2.83155
PC(14:0_16:0)	Plasma_C	17.51	17	0.51	2.95567
PC(14:0_18:2)	Plasma_A	16.03	15.44	0.59	3.7496
PC(14:0_18:2)	Plasma_B	16.02	15.6	0.42	2.65655
PC(14:0_18:2)	Plasma_C	15.97	15.43	0.54	3.43949
PC(14:0_18:1);PC(16:0_16:1)	Plasma_A	17.77	17.09	0.68	3.90132
PC(14:0_18:1);PC(16:0_16:1)	Plasma_B	17.76	17.1	0.66	3.78657
PC(14:0_18:1);PC(16:0_16:1)	Plasma_C	17.71	17.26	0.45	2.57363
PC(16:0/16:0)	Plasma_A	19.57	19.17	0.4	2.06505
PC(16:0/16:0)	Plasma_B	19.56	19.16	0.4	2.06612
PC(16:0/16:0)	Plasma_C	19.52	19.08	0.44	2.27979
PC(15:0_18:2)	Plasma_A	17.05	16.65	0.4	2.37389
PC(15:0_18:2)	Plasma_B	17.04	16.74	0.3	1.7762
PC(15:0_18:2)	Plasma_C	17	16.56	0.44	2.62217
PC(14:0_20:5)	Plasma_A	16.02	15.59	0.43	2.72066
PC(14:0_20:5)	Plasma_B	16.01	15.6	0.41	2.59412
PC(14:0_20:5)	Plasma_C	15.96	15.52	0.44	2.79543
PC(14:0_20:4)	Plasma_A	15.69	15.27	0.42	2.71318
PC(14:0_20:4)	Plasma_B	15.68	15.26	0.42	2.71493
PC(14:0_20:4)	Plasma_C	15.63	15.18	0.45	2.92113
PC(16:1_18:2)	Plasma_A	16.25	15.95	0.3	1.86335
PC(16:1_18:2)	Plasma_B	16.24	15.92	0.32	1.99005
PC(16:1_18:2)	Plasma_C	16.19	15.86	0.33	2.05928
PC(16:0_18:3)a	Plasma_A	16.71	16.22	0.49	2.97601
PC(16:0_18:3)a	Plasma_B	16.69	16.21	0.48	2.91793
PC(16:0_18:3)a	Plasma_C	16.65	16.15	0.5	3.04878
PC(16:0_18:3)b	Plasma_A	17.12	16.69	0.43	2.54363
PC(16:0_18:3)b	Plasma_B	17.11	16.7	0.41	2.42532
PC(16:0_18:3)b	Plasma_C	17.07	16.62	0.45	2.67142
PC(16:0_18:2)	Plasma_A	18.15	17.69	0.46	2.56696
PC(16:0_18:2)	Plasma_B	18.13	17.69	0.44	2.45673
PC(16:0_18:2)	Plasma_C	18.09	17.62	0.47	2.63232
PC(16:0_18:1)	Plasma_A	19.59	19.12	0.47	2.42831
PC(16:0_18:1)	Plasma_B	19.57	19.16	0.41	2.11722
PC(16:0_18:1)	Plasma_C	19.53	19.03	0.5	2.59336
PC(16:0_18:0)	Plasma_A	21.17	21.05	0.12	0.568451
PC(16:0_18:0)	Plasma_B	21.15	21.06	0.09	0.426439
PC(16:0_18:0)	Plasma_C	21.11	20.98	0.13	0.617724
PC(15:0_20:4);PC(17:2_18:2)	Plasma_A	16.85	16.42	0.43	2.58491
PC(15:0_20:4);PC(17:2_18:2)	Plasma_B	16.84	16.42	0.42	2.52556
PC(15:0_20:4);PC(17:2_18:2)	Plasma_C	16.79	16.36	0.43	2.59427
PC(17:0_18:3)a	Plasma_A	17.3	16.88	0.42	2.45758
PC(17:0_18:3)a	Plasma_B	17.28	16.82	0.46	2.69795
PC(17:0_18:3)a	Plasma_C	17.24	16.79	0.45	2.64473
PC(17:0_18:3)b	Plasma_A	17.7	17.28	0.42	2.40137
PC(17:0_18:3)b	Plasma_B	17.69	17.31	0.38	2.17143
PC(17:0_18:3)b	Plasma_C	17.64	17.19	0.45	2.58398
PC(17:0_18:2)a	Plasma_A	18.9	18.51	0.39	2.085
PC(17:0_18:2)a	Plasma_B	18.89	18.52	0.37	1.97808
PC(17:0_18:2)a	Plasma_C	18.84	18.44	0.4	2.14592
PC(17:0_18:2)b	Plasma_A	19.24	18.85	0.39	2.04778
PC(17:0_18:2)b	Plasma_B	19.22	18.82	0.4	2.10305
PC(17:0_18:2)b	Plasma_C	19.18	18.78	0.4	2.10748
PC(17:0_18:1)	Plasma_A	20.56	20.37	0.19	0.928414
PC(17:0_18:1)	Plasma_B	20.54	20.34	0.2	0.978474
PC(17:0_18:1)	Plasma_C	20.5	20.26	0.24	1.17763
PC(18:2_18:3)	Plasma_A	15.07	14.74	0.33	2.21402
PC(18:2_18:3)	Plasma_B	15.07	14.88	0.19	1.26878
PC(18:2_18:3)	Plasma_C	15.02	14.74	0.28	1.88172
PC(16:1_20:4)	Plasma_A	15.9	15.61	0.29	1.84069
PC(16:1_20:4)	Plasma_B	15.89	15.58	0.31	1.97013
PC(16:1_20:4)	Plasma_C	15.85	15.45	0.4	2.55591
PC(16:0_20:5)	Plasma_A	16.51	16.1	0.41	2.51457
PC(16:0_20:5)	Plasma_B	16.5	16.08	0.42	2.57827
PC(16:0_20:5)	Plasma_C	16.46	16.01	0.45	2.77179
PC(16:0_20:4);PC(18:1_18:3)	Plasma_A	21.22	21.16	0.06	0.283152
PC(16:0_20:4);PC(18:1_18:3)	Plasma_B	21.2	20.91	0.29	1.37735
PC(16:0_20:4);PC(18:1_18:3)	Plasma_C	21.16	21.05	0.11	0.521204
PC(18:2/18:2)	Plasma_A	16.87	16.29	0.58	3.49819
PC(18:2/18:2)	Plasma_B	16.86	16.3	0.56	3.37756
PC(18:2/18:2)	Plasma_C	16.81	16.22	0.59	3.57251
PC(16:0_20:3)	Plasma_A	18.71	18.3	0.41	2.21562
PC(16:0_20:3)	Plasma_B	18.69	18.31	0.38	2.05405
PC(16:0_20:3)	Plasma_C	18.65	18.23	0.42	2.27766
PC(18:1_18:2)	Plasma_A	18.44	18.11	0.33	1.80575
PC(18:1_18:2)	Plasma_B	18.42	18.08	0.34	1.86301
PC(18:1_18:2)	Plasma_C	18.38	17.93	0.45	2.47866
PC(18:0_18:2)	Plasma_A	20.16	19.72	0.44	2.20662
PC(18:0_18:2)	Plasma_B	20.14	19.66	0.48	2.41206
PC(18:0_18:2)	Plasma_C	20.1	19.61	0.49	2.46789
PC(18:1/18:1)	Plasma_A	19.96	19.95	0.01	0.0501128
PC(18:1/18:1)	Plasma_B	19.94	19.94	0	0
PC(18:1/18:1)	Plasma_C	19.9	19.82	0.08	0.40282
PC(18:0_18:1)	Plasma_A	21.23	21.03	0.2	0.946522
PC(18:0_18:1)	Plasma_B	21.21	21.04	0.17	0.804734
PC(18:0_18:1)	Plasma_C	21.17	20.98	0.19	0.901542
PC(18:0/18:0)	Plasma_A	22.34	22.45	0.11	0.491181
PC(18:0/18:0)	Plasma_B	22.32	22.46	0.14	0.625279
PC(18:0/18:0)	Plasma_C	22.28	22.46	0.18	0.804649
PC(37:6)a	Plasma_A	16.27	15.95	0.32	1.98634
PC(37:6)a	Plasma_B	16.26	16	0.26	1.6119
PC(37:6)a	Plasma_C	16.21	15.77	0.44	2.75172
PC(37:6)b	Plasma_A	19.72	19.42	0.3	1.53296
PC(37:6)b	Plasma_B	19.7	19.41	0.29	1.483
PC(37:6)b	Plasma_C	19.66	19.37	0.29	1.48604
PC(15:0_22:5)	Plasma_A	17.64	17.64	0	0
PC(15:0_22:5)	Plasma_B	17.63	17.69	0.06	0.339751
PC(15:0_22:5)	Plasma_C	17.59	17.53	0.06	0.341686
PC(37:5)a	Plasma_A	16.99	16.59	0.4	2.38237
PC(37:5)a	Plasma_B	16.97	16.59	0.38	2.2646
PC(37:5)a	Plasma_C	16.93	16.64	0.29	1.72773
PC(37:5)b	Plasma_A	17.22	17.28	0.06	0.347826
PC(37:5)b	Plasma_B	17.21	17.31	0.1	0.579374
PC(37:5)b	Plasma_C	17.16	17.09	0.07	0.408759
PC(37:5)c	Plasma_A	20.75	20.59	0.16	0.774069
PC(37:5)c	Plasma_B	20.73	20.61	0.12	0.580552
PC(37:5)c	Plasma_C	20.69	20.39	0.3	1.46056
PC(37:4)	Plasma_A	18.51	18.13	0.38	2.07424
PC(37:4)	Plasma_B	18.5	18.12	0.38	2.07537
PC(37:4)	Plasma_C	18.46	18.04	0.42	2.30137
PC(17:0_20:4)	Plasma_A	18.95	18.57	0.38	2.02559
PC(17:0_20:4)	Plasma_B	18.93	18.58	0.35	1.86617
PC(17:0_20:4)	Plasma_C	18.89	18.5	0.39	2.08612
PC(38:7)a	Plasma_A	14.92	14.32	0.6	4.10397
PC(38:7)a	Plasma_B	14.91	14.29	0.62	4.24658
PC(38:7)a	Plasma_C	14.86	14.25	0.61	4.191
PC(38:7)b	Plasma_A	15.33	14.98	0.35	2.30947
PC(38:7)b	Plasma_B	15.32	14.96	0.36	2.37781
PC(38:7)b	Plasma_C	15.28	14.9	0.38	2.51822
PC(38:7)c	Plasma_A	16.25	16.29	0.04	0.245851
PC(38:7)c	Plasma_B	16.24	16.25	0.01	0.0615574
PC(38:7)c	Plasma_C	16.19	16.24	0.05	0.308356
PC(16:0_22:6)	Plasma_A	17.41	16.94	0.47	2.73654
PC(16:0_22:6)	Plasma_B	17.4	16.95	0.45	2.62009
PC(16:0_22:6)	Plasma_C	17.35	16.89	0.46	2.68692
PC(18:2_20:4)	Plasma_A	16.38	15.76	0.62	3.85812
PC(18:2_20:4)	Plasma_B	16.37	15.98	0.39	2.41113
PC(18:2_20:4)	Plasma_C	16.32	15.94	0.38	2.35586
PC(16:0_22:5);PC(18:0_20:5)	Plasma_A	18.65	18.24	0.41	2.22282
PC(16:0_22:5);PC(18:0_20:5)	Plasma_B	18.64	18.24	0.4	2.1692
PC(16:0_22:5);PC(18:0_20:5)	Plasma_C	18.59	18.16	0.43	2.34014
PC(18:1_20:4)	Plasma_A	18.07	17.67	0.4	2.23839
PC(18:1_20:4)	Plasma_B	18.06	17.65	0.41	2.29628
PC(18:1_20:4)	Plasma_C	18.01	17.59	0.42	2.35955
PC(16:0_22:4)	Plasma_A	19.34	19	0.34	1.7736
PC(16:0_22:4)	Plasma_B	19.33	18.98	0.35	1.8272
PC(16:0_22:4)	Plasma_C	19.29	18.91	0.38	1.98953
PC(18:0_20:4)	Plasma_A	19.88	19.59	0.29	1.46947
PC(18:0_20:4)	Plasma_B	19.86	19.58	0.28	1.41988
PC(18:0_20:4)	Plasma_C	19.82	19.52	0.3	1.52517
PC(18:1_20:3)a	Plasma_A	18.89	18.57	0.32	1.70849
PC(18:1_20:3)a	Plasma_B	18.88	18.54	0.34	1.81721
PC(18:1_20:3)a	Plasma_C	18.83	18.48	0.35	1.87617
PC(18:1_20:3)b	Plasma_A	19.09	18.72	0.37	1.95715
PC(18:1_20:3)b	Plasma_B	19.08	18.71	0.37	1.95819
PC(18:1_20:3)b	Plasma_C	19.04	18.65	0.39	2.06951
PC(18:0_20:3)	Plasma_A	20.49	20.29	0.2	0.980873
PC(18:0_20:3)	Plasma_B	20.47	20.26	0.21	1.03118
PC(18:0_20:3)	Plasma_C	20.43	20.2	0.23	1.13217
PC(18:0_20:2)	Plasma_A	21.48	21.56	0.08	0.371747
PC(18:0_20:2)	Plasma_B	21.46	21.53	0.07	0.325657
PC(18:0_20:2)	Plasma_C	21.42	21.55	0.13	0.605073
PC(38:2)	Plasma_A	21.19	21.35	0.16	0.752233
PC(38:2)	Plasma_B	21.17	21.34	0.17	0.799812
PC(38:2)	Plasma_C	21.13	21.3	0.17	0.80132
PC(18:0_20:1)	Plasma_A	22.54	22.43	0.11	0.489215
PC(18:0_20:1)	Plasma_B	22.52	22.44	0.08	0.355872
PC(18:0_20:1)	Plasma_C	22.48	22.44	0.04	0.178094
PC(17:0_22:6)	Plasma_A	18.51	18.09	0.42	2.29508
PC(17:0_22:6)	Plasma_B	18.5	18.08	0.42	2.29634
PC(17:0_22:6)	Plasma_C	18.46	17.97	0.49	2.69009
PC(39:6)	Plasma_A	18.06	17.67	0.39	2.18304
PC(39:6)	Plasma_B	18.05	17.67	0.38	2.12766
PC(39:6)	Plasma_C	18	17.59	0.41	2.30402
PC(17:0_22:5)	Plasma_A	19.02	18.62	0.4	2.1254
PC(17:0_22:5)	Plasma_B	19	18.65	0.35	1.85923
PC(17:0_22:5)	Plasma_C	18.96	18.55	0.41	2.18608
PC(19:0_20:4)	Plasma_A	20.67	20.48	0.19	0.923451
PC(19:0_20:4)	Plasma_B	20.65	20.47	0.18	0.875486
PC(19:0_20:4)	Plasma_C	20.61	20.39	0.22	1.07317
PC(39:4)	Plasma_A	19.52	20.08	0.56	2.82828
PC(39:4)	Plasma_B	19.51	20.06	0.55	2.77988
PC(39:4)	Plasma_C	19.47	19.97	0.5	2.5355
PC(20:4_20:4)	Plasma_A	15.82	15.51	0.31	1.97893
PC(20:4_20:4)	Plasma_B	15.81	15.24	0.57	3.6715
PC(20:4_20:4)	Plasma_C	15.77	15.48	0.29	1.856
PC(18:1_22:6)a	Plasma_A	17.5	17.11	0.39	2.25368
PC(18:1_22:6)a	Plasma_B	17.49	17.1	0.39	2.25499
PC(18:1_22:6)a	Plasma_C	17.44	17.02	0.42	2.43761
PC(18:1_22:6)b	Plasma_A	17.74	17.37	0.37	2.10766
PC(18:1_22:6)b	Plasma_B	17.73	17.35	0.38	2.16648
PC(18:1_22:6)b	Plasma_C	17.68	17.3	0.38	2.17267
PC(18:0_22:6)	Plasma_A	19.41	19.06	0.35	1.8196
PC(18:0_22:6)	Plasma_B	19.39	19.03	0.36	1.87402
PC(18:0_22:6)	Plasma_C	19.35	18.97	0.38	1.9833
PC(18:1_22:5)	Plasma_A	18.08	18.15	0.07	0.38642
PC(18:1_22:5)	Plasma_B	18.07	18.12	0.05	0.276319
PC(18:1_22:5)	Plasma_C	18.02	18.1	0.08	0.442968
PC(18:0_22:5)a	Plasma_A	19.94	19.66	0.28	1.41414
PC(18:0_22:5)a	Plasma_B	19.92	19.64	0.28	1.41557
PC(18:0_22:5)a	Plasma_C	19.88	19.58	0.3	1.52053
PC(18:0_22:5)b	Plasma_A	20.46	20.23	0.23	1.1305
PC(18:0_22:5)b	Plasma_B	20.44	20.23	0.21	1.0327
PC(18:0_22:5)b	Plasma_C	20.4	20.16	0.24	1.18343
PC(18:0_22:4)	Plasma_A	20.94	20.8	0.14	0.670819
PC(18:0_22:4)	Plasma_B	20.92	20.81	0.11	0.527199
PC(18:0_22:4)	Plasma_C	20.88	20.83	0.05	0.239751
PC(P-32:0);PC(O-32:1)	Plasma_A	19.21	18.77	0.44	2.31701
PC(P-32:0);PC(O-32:1)	Plasma_B	19.2	18.75	0.45	2.37154
PC(P-32:0);PC(O-32:1)	Plasma_C	19.15	18.71	0.44	2.32435
PC(P-16:0/16:0)	Plasma_A	20.59	20.2	0.39	1.91223
PC(P-16:0/16:0)	Plasma_B	20.57	20.19	0.38	1.86457
PC(P-16:0/16:0)	Plasma_C	20.53	20.13	0.4	1.96754
PC(O-16:0/18:3);PC(P-16:0/18:2)	Plasma_A	19.12	18.74	0.38	2.0074
PC(O-16:0/18:3);PC(P-16:0/18:2)	Plasma_B	19.1	18.65	0.45	2.38411
PC(O-16:0/18:3);PC(P-16:0/18:2)	Plasma_C	19.06	18.61	0.45	2.38917
PC(P-16:0/18:1);PC(P-18:0/16:1)	Plasma_A	20.61	20.21	0.4	1.95982
PC(P-16:0/18:1);PC(P-18:0/16:1)	Plasma_B	20.6	20.17	0.43	2.10939
PC(P-16:0/18:1);PC(P-18:0/16:1)	Plasma_C	20.55	20.32	0.23	1.12552
PC(P-18:0/16:0)	Plasma_A	20.78	20.69	0.09	0.434049
PC(P-18:0/16:0)	Plasma_B	20.76	20.68	0.08	0.3861
PC(P-18:0/16:0)	Plasma_C	20.72	20.22	0.5	2.4426
PC(O-18:0/16:0)	Plasma_A	22.09	22.05	0.04	0.181242
PC(O-18:0/16:0)	Plasma_B	22.07	22.05	0.02	0.0906618
PC(O-18:0/16:0)	Plasma_C	22.03	21.98	0.05	0.227221
PC(O-16:0/20:5);PC(P-16:0/20:4)	Plasma_A	18.98	18.64	0.34	1.80755
PC(O-16:0/20:5);PC(P-16:0/20:4)	Plasma_B	18.96	18.63	0.33	1.75579
PC(O-16:0/20:5);PC(P-16:0/20:4)	Plasma_C	18.92	18.44	0.48	2.56959
PC(O-16:0/20:4);PC(P-18:0/18:3)	Plasma_A	19.19	18.74	0.45	2.37279
PC(O-16:0/20:4);PC(P-18:0/18:3)	Plasma_B	19.17	18.71	0.46	2.42872
PC(O-16:0/20:4);PC(P-18:0/18:3)	Plasma_C	19.13	18.65	0.48	2.54103
PC(O-16:0/20:3)	Plasma_A	19.48	19.15	0.33	1.70852
PC(O-16:0/20:3)	Plasma_B	19.46	19.11	0.35	1.81488
PC(O-16:0/20:3)	Plasma_C	19.42	19.03	0.39	2.02861
PC(O-36:3);PC(P-36:2)	Plasma_A	19.96	19.68	0.28	1.41271
PC(O-36:3);PC(P-36:2)	Plasma_B	19.95	19.66	0.29	1.46428
PC(O-36:3);PC(P-36:2)	Plasma_C	19.9	19.6	0.3	1.51899
PC(P-18:0/18:2)	Plasma_A	20.82	20.61	0.21	1.01376
PC(P-18:0/18:2)	Plasma_B	20.81	20.61	0.2	0.965717
PC(P-18:0/18:2)	Plasma_C	20.76	20.68	0.08	0.3861
PC(P-18:0/18:1)	Plasma_A	20.84	20.97	0.13	0.621861
PC(P-18:0/18:1)	Plasma_B	20.82	20.95	0.13	0.622456
PC(P-18:0/18:1)	Plasma_C	20.78	20.88	0.1	0.480077
PC(P-16:0/22:5)	Plasma_A	19.18	18.64	0.54	2.85563
PC(P-16:0/22:5)	Plasma_B	19.17	18.63	0.54	2.85714
PC(P-16:0/22:5)	Plasma_C	19.12	18.57	0.55	2.91855
PC(P-18:0/20:5)	Plasma_A	18.62	18.19	0.43	2.33632
PC(P-18:0/20:5)	Plasma_B	18.61	18.18	0.43	2.33759
PC(P-18:0/20:5)	Plasma_C	18.56	18.1	0.46	2.50955
PC(O-16:0/22:5);PC(P-18:0/20:4)a	Plasma_A	19.25	18.91	0.34	1.78197
PC(O-16:0/22:5);PC(P-18:0/20:4)a	Plasma_B	19.24	18.9	0.34	1.78291
PC(O-16:0/22:5);PC(P-18:0/20:4)a	Plasma_C	19.2	18.82	0.38	1.99895
PC(P-18:0/20:4)b	Plasma_A	20.66	20.46	0.2	0.972763
PC(P-18:0/20:4)b	Plasma_B	20.64	20.45	0.19	0.924799
PC(P-18:0/20:4)b	Plasma_C	20.6	20.37	0.23	1.12277
PC(O-38:4);PC(P-38:3)a	Plasma_A	20.45	20.2	0.25	1.23001
PC(O-38:4);PC(P-38:3)a	Plasma_B	20.43	20.19	0.24	1.18168
PC(O-38:4);PC(P-38:3)a	Plasma_C	20.39	20.13	0.26	1.28332
PC(O-38:4);PC(P-38:3)b	Plasma_A	20.91	20.74	0.17	0.816327
PC(O-38:4);PC(P-38:3)b	Plasma_B	20.89	20.74	0.15	0.720634
PC(O-38:4);PC(P-38:3)b	Plasma_C	20.84	20.71	0.13	0.625752
PC(O-40:6);PC(P-40:5)a	Plasma_A	19.45	19.15	0.3	1.5544
PC(O-40:6);PC(P-40:5)a	Plasma_B	19.43	19.09	0.34	1.76532
PC(O-40:6);PC(P-40:5)a	Plasma_C	19.39	18.97	0.42	2.18978
PC(O-40:6);PC(P-40:5)b	Plasma_A	20.42	19.7	0.72	3.58923
PC(O-40:6);PC(P-40:5)b	Plasma_B	20.4	19.7	0.7	3.49127
PC(O-40:6);PC(P-40:5)b	Plasma_C	20.36	19.63	0.73	3.65091
PC(O-40:6);PC(P-40:5)c	Plasma_A	21	20.1	0.9	4.37956
PC(O-40:6);PC(P-40:5)c	Plasma_B	20.98	20.21	0.77	3.73877
PC(O-40:6);PC(P-40:5)c	Plasma_C	20.94	19.99	0.95	4.64207
PC(O-18:0/22:5);PC(P-18:0/22:4)	Plasma_A	20.86	20.74	0.12	0.576923
PC(O-18:0/22:5);PC(P-18:0/22:4)	Plasma_B	20.85	20.7	0.15	0.722022
PC(O-18:0/22:5);PC(P-18:0/22:4)	Plasma_C	20.8	20.9	0.1	0.479616
PE(16:0_18:2)	Plasma_A	18.65	18.11	0.54	2.93798
PE(16:0_18:2)	Plasma_B	18.64	18.08	0.56	3.05011
PE(16:0_18:2)	Plasma_C	18.59	18.08	0.51	2.78157
PE(16:0_18:1)	Plasma_A	20	19.7	0.3	1.51134
PE(16:0_18:1)	Plasma_B	19.99	19.7	0.29	1.46133
PE(16:0_18:1)	Plasma_C	19.94	19.65	0.29	1.46502
PE(18:1_18:2)a	Plasma_A	18.74	18.3	0.44	2.37581
PE(18:1_18:2)a	Plasma_B	18.72	18.27	0.45	2.43309
PE(18:1_18:2)a	Plasma_C	18.68	18.38	0.3	1.619
PE(18:1_18:2)b	Plasma_A	19.17	18.72	0.45	2.3753
PE(18:1_18:2)b	Plasma_B	19.15	18.69	0.46	2.43129
PE(18:1_18:2)b	Plasma_C	19.11	18.63	0.48	2.54372
PE(18:0_18:2)	Plasma_A	20.34	20.06	0.28	1.38614
PE(18:0_18:2)	Plasma_B	20.33	20.06	0.27	1.33696
PE(18:0_18:2)	Plasma_C	20.28	20.03	0.25	1.24039
PE(18:0_18:1)	Plasma_A	21.51	21.52	0.01	0.0464792
PE(18:0_18:1)	Plasma_B	21.49	21.51	0.02	0.0930233
PE(18:0_18:1)	Plasma_C	21.45	21.45	0	0
PE(16:0_22:6)	Plasma_A	17.78	17.39	0.39	2.2178
PE(16:0_22:6)	Plasma_B	17.77	17.38	0.39	2.21906
PE(16:0_22:6)	Plasma_C	17.72	17.3	0.42	2.39863
PE(18:1_20:5)	Plasma_A	17.09	16.42	0.67	3.99881
PE(18:1_20:5)	Plasma_B	17.08	16.4	0.68	4.06213
PE(18:1_20:5)	Plasma_C	17.03	16.37	0.66	3.9521
PE(18:0_20:5)	Plasma_A	19.07	18.7	0.37	1.95923
PE(18:0_20:5)	Plasma_B	19.05	18.69	0.36	1.90779
PE(18:0_20:5)	Plasma_C	19.01	18.65	0.36	1.91184
PE(18:1_20:4)	Plasma_A	20.3	20.16	0.14	0.692042
PE(18:1_20:4)	Plasma_B	20.28	20.15	0.13	0.643087
PE(18:1_20:4)	Plasma_C	20.24	19.92	0.32	1.59363
SM(d16:1/14:0)	Plasma_A	13	12.6	0.4	3.125
SM(d16:1/14:0)	Plasma_B	13	12.61	0.39	3.04569
SM(d16:1/14:0)	Plasma_C	12.95	12.53	0.42	3.2967
SM(d31:1)	Plasma_A	14.2	13.69	0.51	3.65722
SM(d31:1)	Plasma_B	14.2	13.68	0.52	3.73027
SM(d31:1)	Plasma_C	14.15	13.64	0.51	3.67039
SM(d32:4)	Plasma_A	13.01	12.58	0.43	3.36069
SM(d32:4)	Plasma_B	13.01	12.58	0.43	3.36069
SM(d32:4)	Plasma_C	12.96	12.53	0.43	3.37387
SM(d16:1/16:0);SM(d18:1/14:0)	Plasma_A	15.42	14.87	0.55	3.63156
SM(d16:1/16:0);SM(d18:1/14:0)	Plasma_B	15.41	14.84	0.57	3.7686
SM(d16:1/16:0);SM(d18:1/14:0)	Plasma_C	15.36	14.8	0.56	3.71353
SM(d32:0)	Plasma_A	16.29	15.7	0.59	3.68865
SM(d32:0)	Plasma_B	16.28	15.69	0.59	3.69096
SM(d32:0)	Plasma_C	16.23	15.65	0.58	3.63864
SM(d17:1/16:0)	Plasma_A	16.62	16.05	0.57	3.48944
SM(d17:1/16:0)	Plasma_B	16.6	16.02	0.58	3.5561
SM(d17:1/16:0)	Plasma_C	16.56	15.98	0.58	3.56484
SM(d34:5)	Plasma_A	13.31	12.89	0.42	3.20611
SM(d34:5)	Plasma_B	13.31	12.88	0.43	3.2837
SM(d34:5)	Plasma_C	13.26	12.84	0.42	3.21839
SM(d16:1/18:3)	Plasma_A	15.41	14.87	0.54	3.56671
SM(d16:1/18:3)	Plasma_B	15.4	14.84	0.56	3.7037
SM(d16:1/18:3)	Plasma_C	15.36	14.8	0.56	3.71353
SM(d18:2/16:0)	Plasma_A	15.73	15.17	0.56	3.6246
SM(d18:2/16:0)	Plasma_B	15.72	15.19	0.53	3.42931
SM(d18:2/16:0)	Plasma_C	15.67	15.1	0.57	3.70491
SM(d34:1)a	Plasma_A	17.37	16.8	0.57	3.33626
SM(d34:1)a	Plasma_B	17.36	16.79	0.57	3.33821
SM(d34:1)a	Plasma_C	17.32	16.75	0.57	3.34605
SM(d34:1)b	Plasma_A	17.74	17.18	0.56	3.20733
SM(d34:1)b	Plasma_B	17.73	17.21	0.52	2.97653
SM(d34:1)b	Plasma_C	17.68	17.13	0.55	3.16001
SM(d17:1/18:3)	Plasma_A	16.64	16.01	0.63	3.85911
SM(d17:1/18:3)	Plasma_B	16.63	16.02	0.61	3.7366
SM(d17:1/18:3)	Plasma_C	16.58	15.98	0.6	3.6855
SM(d35:2)	Plasma_A	16.93	16.38	0.55	3.30231
SM(d35:2)	Plasma_B	16.92	16.37	0.55	3.3043
SM(d35:2)	Plasma_C	16.87	16.37	0.5	3.00842
SM(d17:0/18:1)	Plasma_A	18.4	17.9	0.5	2.75482
SM(d17:0/18:1)	Plasma_B	18.38	17.91	0.47	2.59025
SM(d17:0/18:1)	Plasma_C	18.34	17.83	0.51	2.82002
SM(d17:1/18:0)	Plasma_A	18.82	18.28	0.54	2.91105
SM(d17:1/18:0)	Plasma_B	18.81	18.26	0.55	2.96736
SM(d17:1/18:0)	Plasma_C	18.77	18.21	0.56	3.02866
SM(d36:5)	Plasma_A	15.72	15.2	0.52	3.36352
SM(d36:5)	Plasma_B	15.71	15.16	0.55	3.56333
SM(d36:5)	Plasma_C	15.67	15.12	0.55	3.57259
SM(d18:1/18:3)a	Plasma_A	17.37	16.84	0.53	3.09851
SM(d18:1/18:3)a	Plasma_B	17.36	16.82	0.54	3.15974
SM(d18:1/18:3)a	Plasma_C	17.32	16.73	0.59	3.46549
SM(d18:1/18:3)b	Plasma_A	17.77	17.26	0.51	2.91179
SM(d18:1/18:3)b	Plasma_B	17.76	17.23	0.53	3.02944
SM(d18:1/18:3)b	Plasma_C	17.71	17.15	0.56	3.21285
SM(d18:2/18:0)	Plasma_A	18.01	17.49	0.52	2.92958
SM(d18:2/18:0)	Plasma_B	18	17.5	0.5	2.8169
SM(d18:2/18:0)	Plasma_C	17.95	17.38	0.57	3.22672
SM(d18:1/18:1)	Plasma_A	18.38	17.49	0.89	4.96236
SM(d18:1/18:1)	Plasma_B	18.36	17.5	0.86	4.79643
SM(d18:1/18:1)	Plasma_C	18.32	17.38	0.94	5.26611
SM(d18:1/18:0)	Plasma_A	19.78	19.27	0.51	2.61204
SM(d18:1/18:0)	Plasma_B	19.76	19.28	0.48	2.45902
SM(d18:1/18:0)	Plasma_C	19.72	19.24	0.48	2.46407
SM(d18:0/18:0)	Plasma_A	20.48	20.06	0.42	2.07203
SM(d18:0/18:0)	Plasma_B	20.46	20.04	0.42	2.07407
SM(d18:0/18:0)	Plasma_C	20.42	19.99	0.43	2.12819
SM(d16:1/22:3);SM(d18:1/20:3)	Plasma_A	20.48	20.86	0.38	1.83841
SM(d16:1/22:3);SM(d18:1/20:3)	Plasma_B	20.46	20.83	0.37	1.7922
SM(d16:1/22:3);SM(d18:1/20:3)	Plasma_C	20.42	20.83	0.41	1.98788
SM(d18:1/20:1)	Plasma_A	20	19.65	0.35	1.76545
SM(d18:1/20:1)	Plasma_B	19.98	19.66	0.32	1.61453
SM(d18:1/20:1)	Plasma_C	19.94	19.58	0.36	1.82186
SM(d18:1/20:0)	Plasma_A	21.44	21.24	0.2	0.937207
SM(d18:1/20:0)	Plasma_B	21.42	21.25	0.17	0.796813
SM(d18:1/20:0)	Plasma_C	21.38	21.17	0.21	0.987074
SM(d16:1/23:0);SM(17:1/22:0)	Plasma_A	22.1	22	0.1	0.453515
SM(d16:1/23:0);SM(17:1/22:0)	Plasma_B	22.08	22.01	0.07	0.317532
SM(d16:1/23:0);SM(17:1/22:0)	Plasma_C	22.04	21.89	0.15	0.682905
SM(d40:4)	Plasma_A	21.43	21.24	0.19	0.890555
SM(d40:4)	Plasma_B	21.41	21.27	0.14	0.656045
SM(d40:4)	Plasma_C	21.37	21.16	0.21	0.987538
SM(d16:1/24:1)	Plasma_A	21.31	21.12	0.19	0.895593
SM(d16:1/24:1)	Plasma_B	21.29	21.1	0.19	0.896438
SM(d16:1/24:1)	Plasma_C	21.25	21.05	0.2	0.945626
SM(d18:1/22:1);SM(d18:2/22:0)	Plasma_A	21.57	21.46	0.11	0.511271
SM(d18:1/22:1);SM(d18:2/22:0)	Plasma_B	21.55	21.44	0.11	0.511747
SM(d18:1/22:1);SM(d18:2/22:0)	Plasma_C	21.51	21.36	0.15	0.69979
SM(d18:1/22:0)	Plasma_A	22.68	22.64	0.04	0.176523
SM(d18:1/22:0)	Plasma_B	22.65	22.65	0	0
SM(d18:1/22:0)	Plasma_C	22.61	22.53	0.08	0.354453
SM(d40:0)	Plasma_A	23.05	23.03	0.02	0.0868056
SM(d40:0)	Plasma_B	23.03	23.02	0.01	0.0434311
SM(d40:0)	Plasma_C	22.99	23.02	0.03	0.130406
SM(d41:4)	Plasma_A	22.11	22	0.11	0.498753
SM(d41:4)	Plasma_B	22.09	22	0.09	0.408256
SM(d41:4)	Plasma_C	22.05	21.88	0.17	0.773959
SM(d41:2)a	Plasma_A	21.99	21.89	0.1	0.455789
SM(d41:2)a	Plasma_B	21.97	21.88	0.09	0.41049
SM(d41:2)a	Plasma_C	21.92	21.84	0.08	0.365631
SM(d41:2)b	Plasma_A	22.22	22.15	0.07	0.315529
SM(d41:2)b	Plasma_B	22.2	22.15	0.05	0.225479
SM(d41:2)b	Plasma_C	22.16	22.11	0.05	0.225887
SM(d17:1/24:0);SM(d18:1/23:0)	Plasma_A	23.18	23.17	0.01	0.0431499
SM(d17:1/24:0);SM(d18:1/23:0)	Plasma_B	23.16	23.18	0.02	0.0863185
SM(d17:1/24:0);SM(d18:1/23:0)	Plasma_C	23.12	23.14	0.02	0.0864678
SM(d42:5)a	Plasma_A	21.31	21.09	0.22	1.03774
SM(d42:5)a	Plasma_B	21.29	21.08	0.21	0.991267
SM(d42:5)a	Plasma_C	21.25	21.04	0.21	0.993143
SM(d42:5)b	Plasma_A	21.61	21.47	0.14	0.649954
SM(d42:5)b	Plasma_B	21.59	21.46	0.13	0.603949
SM(d42:5)b	Plasma_C	21.55	21.35	0.2	0.932401
SM(d42:4)	Plasma_A	22.7	22.65	0.05	0.220507
SM(d42:4)	Plasma_B	22.68	22.64	0.04	0.176523
SM(d42:4)	Plasma_C	22.64	22.56	0.08	0.353982
SM(d42:3)	Plasma_A	21.45	21.32	0.13	0.607903
SM(d42:3)	Plasma_B	21.43	21.35	0.08	0.374007
SM(d42:3)	Plasma_C	21.39	21.27	0.12	0.562588
SM(d18:1/24:1)	Plasma_A	22.52	22.49	0.03	0.133304
SM(d18:1/24:1)	Plasma_B	22.5	22.5	0	0
SM(d18:1/24:1)	Plasma_C	22.46	22.46	0	0
SM(d42:2)	Plasma_A	22.62	22.76	0.14	0.617012
SM(d42:2)	Plasma_B	22.6	22.76	0.16	0.705467
SM(d42:2)	Plasma_C	22.56	22.75	0.19	0.838667
SM(d18:1/24:0)	Plasma_A	23.69	23.7	0.01	0.042203
SM(d18:1/24:0)	Plasma_B	23.66	23.68	0.02	0.0844951
SM(d18:1/24:0)	Plasma_C	23.63	23.67	0.04	0.169133
SM(d43:4)	Plasma_A	23.21	23.18	0.03	0.129338
SM(d43:4)	Plasma_B	23.19	23.17	0.02	0.0862813
SM(d43:4)	Plasma_C	23.15	23.17	0.02	0.0863558
SM(d44:5)a	Plasma_A	22.53	22.46	0.07	0.31118
SM(d44:5)a	Plasma_B	22.51	22.45	0.06	0.266904
SM(d44:5)a	Plasma_C	22.47	22.45	0.02	0.0890472
SM(d44:5)b	Plasma_A	22.82	22.84	0.02	0.087604
SM(d44:5)b	Plasma_B	22.79	22.79	0	0
SM(d44:5)b	Plasma_C	22.75	22.75	0	0
SM(d44:4)	Plasma_A	23.69	23.75	0.06	0.252951
SM(d44:4)	Plasma_B	23.67	23.67	0	0
SM(d44:4)	Plasma_C	23.63	23.66	0.03	0.126877
TG(12:0_12:0_18:1);TG(12:0_14:0_16:1);TG(12:0_14:1_16:0)	Plasma_A	25.13	25.41	0.28	1.10803
TG(12:0_12:0_18:1);TG(12:0_14:0_16:1);TG(12:0_14:1_16:0)	Plasma_B	25.1	25.38	0.28	1.10935
TG(12:0_12:0_18:1);TG(12:0_14:0_16:1);TG(12:0_14:1_16:0)	Plasma_C	25.06	25.41	0.35	1.38696
TG(12:0_14:0_18:2);TG(12:0_16:1_16:1)	Plasma_A	25.19	25.48	0.29	1.14466
TG(12:0_14:0_18:2);TG(12:0_16:1_16:1)	Plasma_B	25.16	25.49	0.33	1.30306
TG(12:0_14:0_18:2);TG(12:0_16:1_16:1)	Plasma_C	25.12	25.49	0.37	1.46216
TG(12:0_14:0_18:1);TG(12:0_16:0_16:1)	Plasma_A	25.77	26.05	0.28	1.08066
TG(12:0_14:0_18:1);TG(12:0_16:0_16:1)	Plasma_B	25.74	26.02	0.28	1.08192
TG(12:0_14:0_18:1);TG(12:0_16:0_16:1)	Plasma_C	25.7	26.06	0.36	1.39104
TG(14:0_14:0_16:0);TG(12:0_16:0_16:0)	Plasma_A	26.34	26.62	0.28	1.0574
TG(14:0_14:0_16:0);TG(12:0_16:0_16:0)	Plasma_B	26.31	26.63	0.32	1.20892
TG(14:0_14:0_16:0);TG(12:0_16:0_16:0)	Plasma_C	26.27	26.63	0.36	1.36106
TG(46:3)	Plasma_A	25.19	25.61	0.42	1.65354
TG(46:3)	Plasma_B	25.17	25.6	0.43	1.69391
TG(46:3)	Plasma_C	25.13	25.75	0.62	2.43711
TG(12:0_16:1_18:1);TG(14:0_14:0_18:2);TG(14:0_16:1_16:1)	Plasma_A	25.76	26.09	0.33	1.2729
TG(12:0_16:1_18:1);TG(14:0_14:0_18:2);TG(14:0_16:1_16:1)	Plasma_B	25.74	26.14	0.4	1.54202
TG(12:0_16:1_18:1);TG(14:0_14:0_18:2);TG(14:0_16:1_16:1)	Plasma_C	25.7	26.1	0.4	1.5444
TG (12:0_16:0_18:1);TG(14:0_14:0_18:1);TG(14:0_16:0_16:1)	Plasma_A	26.32	26.62	0.3	1.13336
TG (12:0_16:0_18:1);TG(14:0_14:0_18:1);TG(14:0_16:0_16:1)	Plasma_B	26.29	26.63	0.34	1.28496
TG (12:0_16:0_18:1);TG(14:0_14:0_18:1);TG(14:0_16:0_16:1)	Plasma_C	26.25	26.63	0.38	1.43722
TG(14:0_16:0_16:0)	Plasma_A	26.84	27.15	0.31	1.14836
TG(14:0_16:0_16:0)	Plasma_B	26.81	27.16	0.35	1.29702
TG(14:0_16:0_16:0)	Plasma_C	26.78	27.16	0.38	1.40897
TG(14:0_16:0_17:1)	Plasma_A	26.6	26.92	0.32	1.19581
TG(14:0_16:0_17:1)	Plasma_B	26.57	26.93	0.36	1.34579
TG(14:0_16:0_17:1)	Plasma_C	26.53	26.93	0.4	1.49645
TG(14:0_16:0_17:0)	Plasma_A	27.07	27.42	0.35	1.28464
TG(14:0_16:0_17:0)	Plasma_B	27.04	27.43	0.39	1.43198
TG(14:0_16:0_17:0)	Plasma_C	27	27.27	0.27	0.995025
TG(12:0_18:1_18:3);TG(12:0_18:2_18:2)	Plasma_A	25.53	25.63	0.1	0.39093
TG(12:0_18:1_18:3);TG(12:0_18:2_18:2)	Plasma_B	25.5	25.61	0.11	0.430444
TG(14:0_16:1_18:2)	Plasma_A	25.83	26.13	0.3	1.15473
TG(14:0_16:1_18:2)	Plasma_B	25.8	26.14	0.34	1.3092
TG(14:0_16:1_18:2)	Plasma_C	25.76	26.13	0.37	1.42609
TG(14:0_16:0_18:2);TG(14:0_16:1_18:1);TG(16:0_16:1_16:1)	Plasma_A	26.32	26.66	0.34	1.2835
TG(14:0_16:0_18:2);TG(14:0_16:1_18:1);TG(16:0_16:1_16:1)	Plasma_B	26.29	26.63	0.34	1.28496
TG(14:0_16:0_18:2);TG(14:0_16:1_18:1);TG(16:0_16:1_16:1)	Plasma_C	26.25	26.66	0.41	1.5498
TG(14:0_16:0_18:1);TG(16:0_16:0_16:1)	Plasma_A	26.8	27.15	0.35	1.2975
TG(14:0_16:0_18:1);TG(16:0_16:0_16:1)	Plasma_B	26.78	27.16	0.38	1.40897
TG(14:0_16:0_18:1);TG(16:0_16:0_16:1)	Plasma_C	26.74	27.16	0.42	1.55844
TG(48:0)	Plasma_A	27.36	27.74	0.38	1.37931
TG(48:0)	Plasma_B	27.33	27.81	0.48	1.74102
TG(48:0)	Plasma_C	27.29	27.65	0.36	1.31052
TG(49:3)	Plasma_A	26.12	26.45	0.33	1.25547
TG(49:3)	Plasma_B	26.09	26.44	0.35	1.33257
TG(49:3)	Plasma_C	26.05	26.4	0.35	1.3346
TG(15:0_16:0_18:2);TG(15:0_16:1_18:1)	Plasma_A	26.58	26.96	0.38	1.4195
TG(15:0_16:0_18:2);TG(15:0_16:1_18:1)	Plasma_B	26.55	26.97	0.42	1.56951
TG(15:0_16:0_18:2);TG(15:0_16:1_18:1)	Plasma_C	26.51	26.85	0.34	1.27436
TG(15:0_16:0_18:1);TG(15:0_17:0_17:1)	Plasma_A	27.07	27.42	0.35	1.28464
TG(15:0_16:0_18:1);TG(15:0_17:0_17:1)	Plasma_B	27.04	27.43	0.39	1.43198
TG(15:0_16:0_18:1);TG(15:0_17:0_17:1)	Plasma_C	27	27.38	0.38	1.39757
TG(49:0)	Plasma_A	27.47	27.85	0.38	1.37383
TG(49:0)	Plasma_B	27.44	27.84	0.4	1.44718
TG(49:0)	Plasma_C	27.4	27.8	0.4	1.44928
TG(14:0_18:3_18:3)	Plasma_A	25.15	25.33	0.18	0.713154
TG(14:0_18:3_18:3)	Plasma_B	25.12	25.38	0.26	1.0297
TG(14:0_18:3_18:3)	Plasma_C	25.08	25.45	0.37	1.46448
TG(16:1_16:1_18:3)	Plasma_A	25.44	25.75	0.31	1.21117
TG(16:1_16:1_18:3)	Plasma_B	25.42	25.72	0.3	1.17325
TG(16:1_16:1_18:3)	Plasma_C	25.38	26.1	0.72	2.7972
TG(16:1_16:1_18:2)	Plasma_A	25.88	26.24	0.36	1.38143
TG(16:1_16:1_18:2)	Plasma_B	25.85	26.21	0.36	1.38302
TG(16:1_16:1_18:2)	Plasma_C	25.81	26.32	0.51	1.95665
TG(14:0_18:1_18:2);TG(16:1_16:1_18:1)	Plasma_A	26.35	26.7	0.35	1.31951
TG(14:0_18:1_18:2);TG(16:1_16:1_18:1)	Plasma_B	26.33	26.71	0.38	1.43288
TG(14:0_18:1_18:2);TG(16:1_16:1_18:1)	Plasma_C	26.29	26.66	0.37	1.39754
TG(14:0_18:1_18:1)	Plasma_A	26.79	27.15	0.36	1.33482
TG(14:0_18:1_18:1)	Plasma_B	26.76	27.12	0.36	1.3363
TG(14:0_18:1_18:1)	Plasma_C	26.72	27.16	0.44	1.63326
TG(16:0_16:0_18:2)	Plasma_A	26.79	27.15	0.36	1.33482
TG(16:0_16:0_18:2)	Plasma_B	26.76	27.12	0.36	1.3363
TG(16:0_16:0_18:2)	Plasma_C	26.72	27.16	0.44	1.63326
TG(16:0_16:0_18:1)	Plasma_A	27.33	27.68	0.35	1.2725
TG(16:0_16:0_18:1)	Plasma_B	27.3	27.69	0.39	1.41844
TG(16:0_16:0_18:1)	Plasma_C	27.26	27.65	0.39	1.42051
TG(16:0_16:0_18:0)	Plasma_A	27.79	28.14	0.35	1.25156
TG(16:0_16:0_18:0)	Plasma_B	27.76	28.15	0.39	1.3951
TG(16:0_16:0_18:0)	Plasma_C	27.73	28.1	0.37	1.32545
TG(51:4)	Plasma_A	26.18	26.52	0.34	1.29032
TG(51:4)	Plasma_B	26.15	26.52	0.37	1.40497
TG(51:4)	Plasma_C	26.11	26.51	0.4	1.52033
TG(15:0_16:0_20:3);TG(16:0_17:1_18:2)	Plasma_A	26.62	27	0.38	1.41738
TG(15:0_16:0_20:3);TG(16:0_17:1_18:2)	Plasma_B	26.59	26.97	0.38	1.41897
TG(15:0_16:0_20:3);TG(16:0_17:1_18:2)	Plasma_C	26.55	26.97	0.42	1.56951
TG(51:3)	Plasma_A	27.07	26.98	0.09	0.333025
TG(51:3)	Plasma_B	27.04	26.97	0.07	0.259211
TG(51:3)	Plasma_C	27.01	26.97	0.04	0.148203
TG(16:0_17:0_18:2)	Plasma_A	27.05	27.45	0.4	1.46789
TG(16:0_17:0_18:2)	Plasma_B	27.02	27.47	0.45	1.65168
TG(16:0_17:0_18:2)	Plasma_C	26.98	27.23	0.25	0.922339
TG(16:0_17:1_18:1)	Plasma_A	27.5	27.79	0.29	1.04901
TG(16:0_17:1_18:1)	Plasma_B	27.47	27.88	0.41	1.48148
TG(16:0_17:1_18:1)	Plasma_C	27.43	27.8	0.37	1.33985
TG(16:0_17:0_18:1)	Plasma_A	27.44	27.87	0.43	1.55487
TG(16:0_17:0_18:1)	Plasma_B	27.41	27.88	0.47	1.70013
TG(16:0_17:0_18:1)	Plasma_C	27.38	27.76	0.38	1.37831
TG(52:7)	Plasma_A	25.47	25.53	0.06	0.235294
TG(52:7)	Plasma_B	25.44	25.72	0.28	1.09461
TG(52:7)	Plasma_C	25.41	25.52	0.11	0.431965
TG(16:1_18:2_18:3)	Plasma_A	25.5	25.97	0.47	1.82631
TG(16:1_18:2_18:3)	Plasma_B	25.47	25.84	0.37	1.44221
TG(16:1_18:2_18:3)	Plasma_C	25.44	26.1	0.66	2.56112
TG(52:6)	Plasma_B	25.87	26.33	0.46	1.76245
TG(16:0_16:1_20:4);TG(16:0_18:2_18:3)	Plasma_A	26	26.39	0.39	1.48883
TG(16:0_16:1_20:4);TG(16:0_18:2_18:3)	Plasma_B	25.97	26.33	0.36	1.37667
TG(16:0_16:1_20:4);TG(16:0_18:2_18:3)	Plasma_C	25.93	26.51	0.58	2.21205
TG(16:0_18:1_18:3);TG(16:0_18:2_18:2)	Plasma_A	26.43	26.81	0.38	1.4275
TG(16:0_18:1_18:3);TG(16:0_18:2_18:2)	Plasma_B	26.4	26.78	0.38	1.42911
TG(16:0_18:1_18:3);TG(16:0_18:2_18:2)	Plasma_C	26.36	26.78	0.42	1.58073
TG(16:0_18:1_18:2)	Plasma_A	26.86	27.23	0.37	1.36809
TG(16:0_18:1_18:2)	Plasma_B	26.83	27.28	0.45	1.66328
TG(16:0_18:1_18:2)	Plasma_C	26.79	27.23	0.44	1.62903
TG(16:0_18:0_18:2);TG(16:0_18:1_18:1)	Plasma_A	27.25	27.64	0.39	1.42102
TG(16:0_18:0_18:2);TG(16:0_18:1_18:1)	Plasma_B	27.22	27.62	0.4	1.45879
TG(16:0_18:0_18:2);TG(16:0_18:1_18:1)	Plasma_C	27.19	27.61	0.42	1.53285
TG(16:0_18:0_18:1)	Plasma_A	27.73	28.14	0.41	1.46769
TG(16:0_18:0_18:1)	Plasma_B	27.69	28.15	0.46	1.64756
TG(16:0_18:0_18:1)	Plasma_C	27.66	28.1	0.44	1.57819
TG(16:0_18:0_18:0)	Plasma_A	28.19	28.59	0.4	1.40895
TG(16:0_18:0_18:0)	Plasma_B	28.16	28.56	0.4	1.41044
TG(16:0_18:0_18:0)	Plasma_C	28.13	28.56	0.43	1.51702
TG(53:4)	Plasma_A	26.61	27.02	0.41	1.52899
TG(53:4)	Plasma_B	26.58	27.01	0.43	1.60478
TG(53:4)	Plasma_C	26.54	27	0.46	1.71834
TG(53:3)	Plasma_A	27.08	27.47	0.39	1.42988
TG(53:3)	Plasma_B	27.05	27.46	0.41	1.50431
TG(53:3)	Plasma_C	27.01	27.46	0.45	1.65229
TG(16:0_18:2_19:0)	Plasma_A	27.46	27.87	0.41	1.48202
TG(16:0_18:2_19:0)	Plasma_B	27.43	27.88	0.45	1.62719
TG(16:0_18:2_19:0)	Plasma_C	27.39	27.84	0.45	1.62955
TG(18:2_18:3_18:3)	Plasma_A	25.52	25.86	0.34	1.32347
TG(18:2_18:3_18:3)	Plasma_B	25.5	25.84	0.34	1.3245
TG(18:2_18:3_18:3)	Plasma_C	25.46	25.83	0.37	1.44278
TG (16:0_18:0_19:1)	Plasma_A	27.97	28.32	0.35	1.24356
TG (16:0_18:0_19:1)	Plasma_B	27.93	28.34	0.41	1.45726
TG (16:0_18:0_19:1)	Plasma_C	27.9	28.22	0.32	1.14041
TG(54:7)a	Plasma_A	25.53	25.88	0.35	1.3616
TG(54:7)a	Plasma_B	25.5	25.83	0.33	1.2858
TG(54:7)a	Plasma_C	25.47	26.13	0.66	2.55814
TG(54:7)b	Plasma_A	25.64	25.99	0.35	1.3558
TG(54:7)c	Plasma_A	25.99	26.26	0.27	1.03349
TG(54:7)c	Plasma_B	25.96	26.25	0.29	1.1109
TG(54:7)c	Plasma_C	25.92	26.36	0.44	1.68324
TG(16:1_18:1_20:4);TG(18:2/18:2/18:2)	Plasma_A	26.02	26.32	0.3	1.14635
TG(16:1_18:1_20:4);TG(18:2/18:2/18:2)	Plasma_B	25.99	26.33	0.34	1.29969
TG(16:1_18:1_20:4);TG(18:2/18:2/18:2)	Plasma_C	25.95	26.36	0.41	1.56758
TG(54:6)	Plasma_A	26.29	26.6	0.31	1.17224
TG(54:6)	Plasma_B	26.26	26.59	0.33	1.24882
TG(54:6)	Plasma_C	26.22	26.59	0.37	1.40125
TG(18:1_18:2_18:2)	Plasma_A	26.43	26.88	0.45	1.68824
TG(18:1_18:2_18:2)	Plasma_B	26.4	26.86	0.46	1.72738
TG(18:1_18:2_18:2)	Plasma_C	26.36	26.82	0.46	1.72997
TG(16:0_18:1_20:4)	Plasma_A	26.71	27.07	0.36	1.33879
TG(16:0_18:1_20:4)	Plasma_B	26.68	27.05	0.37	1.37726
TG(16:0_18:1_20:4)	Plasma_C	26.64	27.04	0.4	1.49031
TG(54:4)	Plasma_A	26.88	27.36	0.48	1.76991
TG(54:4)	Plasma_B	26.85	27.31	0.46	1.69867
TG(54:4)	Plasma_C	26.81	27.27	0.46	1.70118
TG(18:0_18:1_18:2);TG(18:1/18:1/18:1)	Plasma_A	27.27	27.76	0.49	1.78085
TG(18:0_18:1_18:2);TG(18:1/18:1/18:1)	Plasma_B	27.24	27.77	0.53	1.92692
TG(18:0_18:1_18:2);TG(18:1/18:1/18:1)	Plasma_C	27.2	27.69	0.49	1.78539
TG(18:0_18:1_18:1)	Plasma_A	27.69	28.1	0.41	1.4698
TG(18:0_18:1_18:1)	Plasma_B	27.66	28.07	0.41	1.47138
TG(18:0_18:1_18:1)	Plasma_C	27.62	28.1	0.48	1.7229
TG(18:0_18:0_18:1)	Plasma_A	28.17	28.59	0.42	1.47992
TG(18:0_18:0_18:1)	Plasma_B	28.14	28.56	0.42	1.48148
TG(18:0_18:0_18:1)	Plasma_C	28.11	28.56	0.45	1.58814
TG(18:0/18:0/18:0)	Plasma_A	28.62	28.59	0.03	0.104877
TG(18:0/18:0/18:0)	Plasma_B	28.59	28.56	0.03	0.104987
TG(18:0/18:0/18:0)	Plasma_C	28.55	28.56	0.01	0.0350201
TG(56:10)a	Plasma_A	24.97	25.23	0.26	1.03586
TG(56:10)a	Plasma_B	24.94	25.19	0.25	0.997407
TG(56:10)a	Plasma_C	24.9	25.22	0.32	1.27694
TG(56:10)b	Plasma_C	25.25	25.41	0.16	0.631662
TG(16:1_20:4_20:4);TG(18:2_18:3_20:4)	Plasma_A	25.42	25.71	0.29	1.13436
TG(16:1_20:4_20:4);TG(18:2_18:3_20:4)	Plasma_B	25.39	25.68	0.29	1.1357
TG(16:1_20:4_20:4);TG(18:2_18:3_20:4)	Plasma_C	25.35	25.83	0.48	1.87573
TG(56:8)a	Plasma_A	25.85	26.14	0.29	1.1156
TG(56:8)a	Plasma_B	25.82	26.17	0.35	1.34641
TG(56:8)a	Plasma_C	25.79	26.13	0.34	1.30971
TG(56:8)b	Plasma_A	26.04	26.37	0.33	1.2593
TG(56:8)b	Plasma_B	26.02	26.4	0.38	1.44983
TG(56:8)b	Plasma_C	25.98	26.36	0.38	1.45204
TG(16:0_18:3_22:4)	Plasma_A	26.52	26.88	0.36	1.34831
TG(16:0_18:3_22:4)	Plasma_B	26.49	26.9	0.41	1.53587
TG(16:0_18:3_22:4)	Plasma_C	26.46	26.82	0.36	1.35135
TG(18:1_18:2_20:4)	Plasma_A	26.24	26.58	0.34	1.28739
TG(18:1_18:2_20:4)	Plasma_B	26.21	26.56	0.35	1.32651
TG(18:1_18:2_20:4)	Plasma_C	26.18	26.59	0.41	1.55391
TG(18:1_18:1_20:4)	Plasma_A	26.69	27.04	0.35	1.30281
TG(18:1_18:1_20:4)	Plasma_B	26.66	27.05	0.39	1.45224
TG(18:1_18:1_20:4)	Plasma_C	26.62	27.04	0.42	1.56541
TG(18:0_18:0_20:5);TG(18:0_18:1_20:4)	Plasma_A	27.1	27.53	0.43	1.57423
TG(18:0_18:0_20:5);TG(18:0_18:1_20:4)	Plasma_B	27.07	27.54	0.47	1.7213
TG(18:0_18:0_20:5);TG(18:0_18:1_20:4)	Plasma_C	27.04	27.54	0.5	1.83217
TG(56:4)a	Plasma_A	27.41	27.81	0.4	1.44875
TG(56:4)a	Plasma_B	27.38	27.81	0.43	1.55825
TG(56:4)a	Plasma_C	27.35	27.76	0.41	1.48793
TG(56:4)b	Plasma_A	27.64	28.12	0.48	1.72166
TG(56:4)b	Plasma_B	27.61	28.03	0.42	1.50971
TG(56:4)b	Plasma_C	27.57	28.07	0.5	1.79727
TG(18:0_18:1_20:1)	Plasma_A	28.15	28.59	0.44	1.55093
TG(18:0_18:1_20:1)	Plasma_B	28.12	28.53	0.41	1.44748
TG(18:0_18:1_20:1)	Plasma_C	28.08	28.52	0.44	1.55477
TG(18:1_20:5_20:5);TG(18:2_20:4_20:5)	Plasma_A	25.54	25.48	0.06	0.235202
TG(18:1_20:5_20:5);TG(18:2_20:4_20:5)	Plasma_B	25.51	25.46	0.05	0.196194
TG(18:1_20:5_20:5);TG(18:2_20:4_20:5)	Plasma_C	25.48	25.45	0.03	0.117809
TG(18:2_20:4_20:4)	Plasma_A	25.6	25.94	0.34	1.31936
TG(18:2_20:4_20:4)	Plasma_B	25.57	25.91	0.34	1.3209
TG(18:2_20:4_20:4)	Plasma_C	25.53	25.87	0.34	1.32296
TG(18:1_20:4_20:4)	Plasma_A	26.05	26.43	0.38	1.44817
TG(18:1_20:4_20:4)	Plasma_B	26.03	26.44	0.41	1.5628
TG(18:1_20:4_20:4)	Plasma_C	25.99	26.4	0.41	1.56518
TG(58:8)a	Plasma_A	26.23	26.56	0.33	1.25024
TG(58:8)a	Plasma_B	26.2	26.55	0.35	1.32701
TG(58:8)a	Plasma_C	26.17	26.4	0.23	0.875024
TG(58:8)b	Plasma_A	26.51	26.98	0.47	1.75734
TG(58:8)b	Plasma_B	26.48	26.97	0.49	1.83349
TG(58:8)b	Plasma_C	26.45	26.81	0.36	1.35186
TG(58:7)a	Plasma_A	26.64	27.09	0.45	1.67504
TG(58:7)a	Plasma_B	26.61	27.01	0.4	1.49198
TG(58:7)a	Plasma_C	26.58	27	0.42	1.56775
TG(58:7)b	Plasma_A	26.98	27.43	0.45	1.65411
TG(58:7)b	Plasma_B	26.95	27.43	0.48	1.76535
TG(58:7)b	Plasma_C	26.92	27.46	0.54	1.98602
TG(16:0_20:2_22:4);TG(18:0_18:0_22:6)	Plasma_A	27.2	27.49	0.29	1.06052
TG(16:0_20:2_22:4);TG(18:0_18:0_22:6)	Plasma_B	27.17	27.5	0.33	1.20724
TG(16:0_20:2_22:4);TG(18:0_18:0_22:6)	Plasma_C	27.13	27.5	0.37	1.35457
TG(58:5)a	Plasma_A	27.51	27.85	0.34	1.22832
TG(58:5)a	Plasma_B	27.48	27.88	0.4	1.44509
TG(58:5)a	Plasma_C	27.44	27.84	0.4	1.44718
TG(58:5)b	Plasma_A	27.66	28.08	0.42	1.507
TG(58:5)b	Plasma_B	27.63	28	0.37	1.33022
TG(58:5)b	Plasma_C	27.6	28.03	0.43	1.54593
TG(58:4)	Plasma_A	27.66	28.23	0.57	2.03972
TG(58:4)	Plasma_B	27.63	28.26	0.63	2.25443
TG(58:4)	Plasma_C	27.59	28.18	0.59	2.11583
TG(18:1_20:1_20:1)	Plasma_A	28.14	28.59	0.45	1.58646
TG(18:1_20:1_20:1)	Plasma_B	28.11	28.56	0.45	1.58814
TG(18:1_20:1_20:1)	Plasma_C	28.07	28.56	0.49	1.73053
TG(58:2)	Plasma_A	28.51	29.03	0.52	1.80744
TG(58:2)	Plasma_B	28.48	28.98	0.5	1.74034
TG(58:2)	Plasma_C	28.45	28.98	0.53	1.84573
TG(60:13)	Plasma_A	24.9	25.23	0.33	1.31658
TG(60:13)	Plasma_B	24.87	25.26	0.39	1.55595
TG(60:13)	Plasma_C	24.83	25.22	0.39	1.55844
TG(60:12)	Plasma_A	25.43	25.69	0.26	1.01721
TG(60:12)	Plasma_B	25.4	25.76	0.36	1.40735
TG(60:12)	Plasma_C	25.37	25.71	0.34	1.33125
TG(60:11)a	Plasma_A	25.67	25.95	0.28	1.08485
TG(60:11)a	Plasma_B	25.64	25.95	0.31	1.20178
TG(60:11)a	Plasma_C	25.61	25.87	0.26	1.0101
TG(60:11)b	Plasma_A	25.85	26.18	0.33	1.2685
TG(60:11)b	Plasma_B	25.82	26.21	0.39	1.49914
TG(60:11)b	Plasma_C	25.79	26.13	0.34	1.30971
TG(60:10)a	Plasma_A	26.1	26.45	0.35	1.33206
TG(60:10)a	Plasma_B	26.07	26.44	0.37	1.40926
TG(60:10)a	Plasma_C	26.03	26.36	0.33	1.25978
TG(60:10)b	Plasma_C	26.18	26.59	0.41	1.55391
				0.34559	2.41524
